# Supplementary material
Source: publisher site journal article supplement (https://www.dovepress.com/article/546362)
Supplement: Supplementary file 1 [file Supplementary%20File_1.docx]

**Supplementary Table S1.** Description of Genome-Wide Association Study (GWAS) summary data sources.

| **Traits** | **Data source** | **GWAS ID** | **Case/Control** | **SNPs** |
| --- | --- | --- | --- | --- |
| Alopecia areata | FINNGen | finn-b-L12_ALOPECAREATA | 767 / 394105 | 16,380,450 |
| Androgenic alopecia | FINNGen | finn-b-L12_ALOPECANDRO | 220/ 219249 | 16,379,661 |
| Scarring alopecia | FINNGen | finn-b-L12_HAIRLOSSSCAR | 209/ 394105 | 16,380,450 |
| Nonscarring alopecia | FINNGen | finn-b-L12_HAIRLOSSNONSCAR | 227/ 394105 | 16,380,450 |
| Morningness | PMID: 30696823 | GCST007565 | 252,287/150,908 | NA |
| Daytime nap | PMID: 30952852 | ebi-a-GCST011494 | 452,633 |  |
| Insomnia | PMID: 30804565 | ieu-a-1129 | 386,533 |  |
| Sleep duration | PMID: 30846698 | GCST007561 | 446,118 |  |
| GWAS, genome-wide association studies; SNPs, single nucleotide polymorphism. | | | | |

The table provides details on the GWAS consortia and datasets used for each trait in the Mendelian randomization analysis. Abbreviations: GWAS, Genome-wide association study; PMID, PubMed Unique Identifier; FINNGen, FinnGen consortium; GCST, GWAS Catalog study accession number; ebi-a-GCST, EBI GWAS Catalog study accession number.

**Supplementary Table S2.** Detailed information of instrumental variables (SNPs) for sleep characteristics.

| Chr, chromosome; Eaf, Effect allele frequency; SE, standard error; SNP, single nucleotide polymorphisms. | | | | | | | | | | | | | |
| --- | --- | --- | --- | --- | --- | --- | --- | --- | --- | --- | --- | --- | --- |
| **Exposure** | **SNP** | **Chr** | **Pos** | **Effect_allele** | **Other_allele** | **Eaf** | **Beta** | **SE** | **P-value** | **MR_keep** | **Pval_origin** | **ID** | **Sample size** |
| Morningness | rs17374439 | 1 | 7888438 | C | T | 0.803508 | -0.05555 | 0.005661 | 1.20E-22 | TRUE | reported | Sprj06 | 403195 |
| Morningness | rs3767240 | 1 | 21163921 | T | C | 0.6179 | -0.03125 | 0.004627 | 7.30E-12 | TRUE | reported | Sprj06 | 403195 |
| Morningness | rs12140153 | 1 | 62579891 | G | T | 0.904974 | 0.048488 | 0.007877 | 4.80E-10 | TRUE | reported | Sprj06 | 403195 |
| Morningness | rs7547493 | 1 | 77775233 | A | G | 0.82194 | -0.05828 | 0.005875 | 2.50E-23 | TRUE | reported | Sprj06 | 403195 |
| Morningness | rs11588913 | 1 | 79963816 | G | A | 0.601488 | 0.025238 | 0.004592 | 2.50E-08 | TRUE | reported | Sprj06 | 403195 |
| Morningness | rs72720396 | 1 | 91191582 | A | G | 0.769471 | -0.04309 | 0.005339 | 5.30E-16 | TRUE | reported | Sprj06 | 403195 |
| Morningness | rs6656331 | 1 | 96971019 | C | T | 0.475922 | 0.027124 | 0.004512 | 1.50E-09 | TRUE | reported | Sprj06 | 403195 |
| Morningness | rs17575798 | 1 | 110086451 | G | A | 0.806886 | 0.039235 | 0.005689 | 7.80E-12 | TRUE | reported | Sprj06 | 403195 |
| Morningness | rs6537834 | 1 | 115108870 | T | C | 0.385278 | -0.02522 | 0.004624 | 3.50E-08 | TRUE | reported | Sprj06 | 403195 |
| Morningness | rs11587758 | 1 | 150327106 | G | A | 0.604254 | -0.03461 | 0.004591 | 3.80E-14 | TRUE | reported | Sprj06 | 403195 |
| Morningness | rs75650221 | 1 | 174421994 | C | T | 0.961665 | -0.0647 | 0.011744 | 3.30E-08 | TRUE | reported | Sprj06 | 403195 |
| Morningness | rs11580135 | 1 | 179417780 | T | C | 0.317102 | -0.02759 | 0.004834 | 1.30E-08 | TRUE | reported | Sprj06 | 403195 |
| Morningness | rs1144566 | 1 | 182569626 | T | C | 0.030195 | 0.170568 | 0.013139 | 2.80E-38 | TRUE | reported | Sprj06 | 403195 |
| Morningness | rs10196909 | 2 | 4651199 | C | A | 0.481825 | 0.032114 | 0.004509 | 6.20E-13 | TRUE | reported | Sprj06 | 403195 |
| Morningness | rs75120545 | 2 | 44271496 | C | T | 0.969822 | -0.09747 | 0.013897 | 2.90E-12 | TRUE | reported | Sprj06 | 403195 |
| Morningness | rs786406 | 2 | 44735953 | A | G | 0.297822 | -0.03273 | 0.004923 | 1.00E-11 | TRUE | reported | Sprj06 | 403195 |
| Morningness | rs10495976 | 2 | 49750698 | A | T | 0.609803 | -0.02807 | 0.004641 | 8.00E-10 | TRUE | reported | Sprj06 | 403195 |
| Morningness | rs7602425 | 2 | 50460480 | C | T | 0.924493 | -0.05362 | 0.008545 | 3.20E-10 | TRUE | reported | Sprj06 | 403195 |
| Morningness | rs778147 | 2 | 61606566 | C | A | 0.366787 | 0.029684 | 0.004669 | 4.60E-10 | TRUE | reported | Sprj06 | 403195 |
| Morningness | rs6744983 | 2 | 76346385 | G | T | 0.62256 | -0.02532 | 0.004643 | 4.90E-08 | TRUE | reported | Sprj06 | 403195 |
| Morningness | rs10520176 | 2 | 77217310 | T | C | 0.501844 | 0.033366 | 0.004511 | 2.00E-13 | TRUE | reported | Sprj06 | 403195 |
| Morningness | rs28380327 | 2 | 144232491 | A | T | 0.629168 | 0.028986 | 0.004659 | 7.80E-10 | TRUE | reported | Sprj06 | 403195 |
| Morningness | rs1947198 | 2 | 149390435 | C | T | 0.87783 | -0.03967 | 0.00687 | 3.20E-09 | TRUE | reported | Sprj06 | 403195 |
| Morningness | rs11679484 | 2 | 198921604 | C | A | 0.626068 | -0.02985 | 0.004672 | 1.60E-10 | TRUE | reported | Sprj06 | 403195 |
| Morningness | rs138964083 | 2 | 206908054 | C | T | 0.941426 | -0.05916 | 0.0096 | 1.00E-09 | TRUE | reported | Sprj06 | 403195 |
| Morningness | rs77008212 | 2 | 239307113 | A | G | 0.912884 | 0.08257 | 0.007986 | 1.10E-24 | TRUE | reported | Sprj06 | 403195 |
| Morningness | rs114870822 | 2 | 239353793 | G | A | 0.987205 | -0.10837 | 0.020118 | 3.40E-08 | TRUE | reported | Sprj06 | 403195 |
| Morningness | rs34581681 | 3 | 2435647 | G | A | 0.839317 | 0.034486 | 0.00618 | 4.20E-08 | TRUE | reported | Sprj06 | 403195 |
| Morningness | rs149611468 | 3 | 8817423 | T | C | 0.98802 | 0.119935 | 0.021115 | 1.30E-08 | TRUE | reported | Sprj06 | 403195 |
| Morningness | rs13059636 | 3 | 24935790 | A | G | 0.528035 | -0.03179 | 0.004533 | 3.50E-12 | TRUE | reported | Sprj06 | 403195 |
| Morningness | rs115774037 | 3 | 36834668 | T | C | 0.973872 | -0.07875 | 0.014039 | 3.50E-08 | TRUE | reported | Sprj06 | 403195 |
| Morningness | rs11712056 | 3 | 49914397 | T | C | 0.556466 | 0.031956 | 0.004533 | 3.70E-12 | TRUE | reported | Sprj06 | 403195 |
| Morningness | rs60194061 | 3 | 77301121 | G | A | 0.73032 | -0.03264 | 0.005111 | 8.60E-11 | TRUE | reported | Sprj06 | 403195 |
| Morningness | rs957501 | 3 | 85791657 | T | A | 0.336033 | 0.026317 | 0.004775 | 3.00E-08 | TRUE | reported | Sprj06 | 403195 |
| Morningness | rs13065394 | 3 | 132971327 | G | T | 0.711759 | 0.029798 | 0.00497 | 2.20E-09 | TRUE | reported | Sprj06 | 403195 |
| Morningness | rs2102506 | 3 | 156342849 | G | A | 0.3605 | 0.02933 | 0.004728 | 8.30E-10 | TRUE | reported | Sprj06 | 403195 |
| Morningness | rs3850174 | 3 | 172364093 | T | A | 0.742864 | 0.03185 | 0.005196 | 1.40E-09 | TRUE | reported | Sprj06 | 403195 |
| Morningness | rs2239626 | 3 | 185998884 | T | C | 0.695468 | -0.03358 | 0.004909 | 5.00E-12 | TRUE | reported | Sprj06 | 403195 |
| Morningness | rs34627176 | 4 | 1006200 | G | A | 0.786135 | -0.02988 | 0.005513 | 3.60E-08 | TRUE | reported | Sprj06 | 403195 |
| Morningness | rs231398 | 4 | 2832189 | G | A | 0.837855 | 0.035451 | 0.006156 | 5.80E-09 | TRUE | reported | Sprj06 | 403195 |
| Morningness | rs12498561 | 4 | 21860763 | C | G | 0.495316 | -0.02469 | 0.004513 | 4.60E-08 | TRUE | reported | Sprj06 | 403195 |
| Morningness | rs28634184 | 4 | 62873419 | C | T | 0.749415 | 0.029908 | 0.005211 | 1.30E-08 | TRUE | reported | Sprj06 | 403195 |
| Morningness | rs7691121 | 4 | 83274208 | C | G | 0.767925 | 0.034051 | 0.00533 | 1.00E-10 | TRUE | reported | Sprj06 | 403195 |
| Morningness | rs4339281 | 4 | 118315560 | A | G | 0.872986 | 0.039406 | 0.006773 | 5.30E-09 | TRUE | reported | Sprj06 | 403195 |
| Morningness | rs4241964 | 4 | 137053959 | T | G | 0.525037 | -0.03264 | 0.004533 | 7.20E-13 | TRUE | reported | Sprj06 | 403195 |
| Morningness | rs10067113 | 5 | 26016363 | C | T | 0.380528 | -0.02806 | 0.004657 | 2.50E-09 | TRUE | reported | Sprj06 | 403195 |
| Morningness | rs7701529 | 5 | 63861475 | A | T | 0.237701 | -0.03001 | 0.005321 | 1.70E-08 | TRUE | reported | Sprj06 | 403195 |
| Morningness | rs34875688 | 5 | 88182026 | T | A | 0.767268 | 0.03203 | 0.005341 | 1.10E-09 | TRUE | reported | Sprj06 | 403195 |
| Morningness | rs12055234 | 5 | 104037760 | G | A | 0.67152 | -0.02715 | 0.0048 | 1.50E-08 | TRUE | reported | Sprj06 | 403195 |
| Morningness | rs1027742 | 5 | 115904410 | A | G | 0.738161 | 0.030692 | 0.00514 | 3.60E-09 | TRUE | reported | Sprj06 | 403195 |
| Morningness | rs2910032 | 5 | 152540354 | C | T | 0.482294 | -0.0337 | 0.004512 | 1.10E-13 | TRUE | reported | Sprj06 | 403195 |
| Morningness | rs7735794 | 5 | 175339984 | G | A | 0.775914 | -0.03139 | 0.005708 | 4.50E-08 | TRUE | reported | Sprj06 | 403195 |
| Morningness | rs9369915 | 6 | 13191447 | G | A | 0.694286 | -0.03719 | 0.004916 | 3.00E-14 | TRUE | reported | Sprj06 | 403195 |
| Morningness | rs2842638 | 6 | 41583576 | T | G | 0.576697 | 0.030655 | 0.004608 | 1.90E-11 | TRUE | reported | Sprj06 | 403195 |
| Morningness | rs2653349 | 6 | 55142337 | A | G | 0.214617 | 0.061341 | 0.005489 | 5.20E-29 | TRUE | reported | Sprj06 | 403195 |
| Morningness | rs60616179 | 6 | 110244765 | A | G | 0.945063 | 0.056252 | 0.009965 | 9.20E-09 | TRUE | reported | Sprj06 | 403195 |
| Morningness | rs520954 | 6 | 153135378 | A | G | 0.672827 | -0.04226 | 0.004797 | 1.60E-18 | TRUE | reported | Sprj06 | 403195 |
| Morningness | rs3877930 | 6 | 153574103 | A | G | 0.986059 | -0.11232 | 0.019205 | 3.00E-09 | TRUE | reported | Sprj06 | 403195 |
| Morningness | rs9365769 | 6 | 165186963 | A | G | 0.436791 | 0.026284 | 0.004574 | 7.30E-09 | TRUE | reported | Sprj06 | 403195 |
| Morningness | rs1494185 | 7 | 24087655 | G | A | 0.725563 | 0.028783 | 0.005053 | 1.10E-08 | TRUE | reported | Sprj06 | 403195 |
| Morningness | rs12669911 | 7 | 32262377 | A | C | 0.384427 | -0.02947 | 0.004665 | 1.80E-10 | TRUE | reported | Sprj06 | 403195 |
| Morningness | rs6967481 | 7 | 50642701 | C | T | 0.50325 | -0.02992 | 0.004525 | 1.90E-11 | TRUE | reported | Sprj06 | 403195 |
| Morningness | rs202157 | 7 | 101637753 | C | T | 0.29887 | 0.039711 | 0.004936 | 1.30E-15 | TRUE | reported | Sprj06 | 403195 |
| Morningness | rs4729854 | 7 | 102383663 | T | A | 0.516577 | 0.044306 | 0.004611 | 1.90E-21 | TRUE | reported | Sprj06 | 403195 |
| Morningness | rs1524472 | 7 | 115676877 | A | G | 0.440956 | 0.025295 | 0.004535 | 2.10E-08 | TRUE | reported | Sprj06 | 403195 |
| Morningness | rs13269289 | 8 | 4843924 | G | A | 0.673433 | -0.02758 | 0.004851 | 5.50E-09 | TRUE | reported | Sprj06 | 403195 |
| Morningness | rs11786306 | 8 | 8208759 | G | C | 0.646069 | -0.02922 | 0.004747 | 7.00E-10 | TRUE | reported | Sprj06 | 403195 |
| Morningness | rs13255030 | 8 | 31671330 | A | G | 0.58516 | 0.026079 | 0.00458 | 1.50E-08 | TRUE | reported | Sprj06 | 403195 |
| Morningness | rs7001604 | 8 | 33680979 | T | C | 0.613053 | -0.03184 | 0.004652 | 7.30E-12 | TRUE | reported | Sprj06 | 403195 |
| Morningness | rs769066 | 8 | 53145698 | T | C | 0.816231 | -0.03291 | 0.005833 | 1.90E-08 | TRUE | reported | Sprj06 | 403195 |
| Morningness | rs4321976 | 8 | 76614958 | T | C | 0.778752 | 0.032829 | 0.005431 | 8.70E-10 | TRUE | reported | Sprj06 | 403195 |
| Morningness | rs1470764 | 8 | 101950038 | G | A | 0.387169 | 0.028581 | 0.004631 | 5.90E-10 | TRUE | reported | Sprj06 | 403195 |
| Morningness | rs12682033 | 8 | 116701130 | T | C | 0.240285 | 0.034887 | 0.005293 | 6.10E-11 | TRUE | reported | Sprj06 | 403195 |
| Morningness | rs10976942 | 9 | 8310813 | C | A | 0.917117 | -0.04936 | 0.00817 | 1.00E-09 | TRUE | reported | Sprj06 | 403195 |
| Morningness | rs308521 | 9 | 37367094 | T | C | 0.602903 | 0.027909 | 0.004619 | 1.50E-09 | TRUE | reported | Sprj06 | 403195 |
| Morningness | rs62553781 | 9 | 76679777 | C | T | 0.965073 | 0.082827 | 0.012302 | 3.00E-11 | TRUE | reported | Sprj06 | 403195 |
| Morningness | rs10123584 | 9 | 115202610 | G | A | 0.292722 | 0.027043 | 0.004958 | 4.00E-08 | TRUE | reported | Sprj06 | 403195 |
| Morningness | rs10818834 | 9 | 126317324 | T | C | 0.733086 | 0.032301 | 0.005114 | 4.20E-10 | TRUE | reported | Sprj06 | 403195 |
| Morningness | rs34619169 | 9 | 139327277 | G | A | 0.692101 | -0.02728 | 0.004886 | 1.50E-08 | TRUE | reported | Sprj06 | 403195 |
| Morningness | rs28458909 | 9 | 140257189 | C | T | 0.876461 | 0.06765 | 0.006838 | 4.70E-23 | TRUE | reported | Sprj06 | 403195 |
| Morningness | rs77728753 | 10 | 3378299 | A | G | 0.99689 | -0.23301 | 0.041755 | 1.30E-08 | TRUE | reported | Sprj06 | 403195 |
| Morningness | rs2893787 | 10 | 60568697 | G | A | 0.2553 | 0.028845 | 0.005165 | 3.50E-08 | TRUE | reported | Sprj06 | 403195 |
| Morningness | rs4752593 | 10 | 123536490 | G | C | 0.371575 | 0.026568 | 0.004685 | 9.80E-09 | TRUE | reported | Sprj06 | 403195 |
| Morningness | rs6599694 | 10 | 125124884 | G | T | 0.656185 | 0.026671 | 0.00477 | 2.10E-08 | TRUE | reported | Sprj06 | 403195 |
| Morningness | rs72632979 | 11 | 16615883 | A | G | 0.828665 | 0.034605 | 0.005997 | 4.00E-09 | TRUE | reported | Sprj06 | 403195 |
| Morningness | rs10501087 | 11 | 27670108 | T | C | 0.799452 | -0.03469 | 0.005624 | 5.40E-10 | TRUE | reported | Sprj06 | 403195 |
| Morningness | rs512647 | 11 | 30445366 | G | C | 0.556369 | -0.02449 | 0.004539 | 4.20E-08 | TRUE | reported | Sprj06 | 403195 |
| Morningness | rs11032362 | 11 | 33759092 | G | A | 0.909159 | -0.06727 | 0.007837 | 7.30E-18 | TRUE | reported | Sprj06 | 403195 |
| Morningness | rs12787765 | 11 | 58400686 | G | A | 0.759938 | 0.033753 | 0.00528 | 1.10E-10 | TRUE | reported | Sprj06 | 403195 |
| Morningness | rs10891630 | 11 | 114011665 | G | A | 0.611281 | -0.02887 | 0.004951 | 9.40E-09 | TRUE | reported | Sprj06 | 403195 |
| Morningness | rs73606718 | 11 | 122814474 | G | A | 0.879064 | 0.040119 | 0.006915 | 5.70E-09 | TRUE | reported | Sprj06 | 403195 |
| Morningness | rs2467109 | 12 | 23064038 | T | A | 0.718089 | -0.02768 | 0.005017 | 3.90E-08 | TRUE | reported | Sprj06 | 403195 |
| Morningness | rs7302062 | 12 | 24065752 | T | C | 0.55303 | 0.031777 | 0.004534 | 5.20E-12 | TRUE | reported | Sprj06 | 403195 |
| Morningness | rs7313852 | 12 | 38908389 | G | A | 0.564644 | 0.047706 | 0.004558 | 3.80E-25 | TRUE | reported | Sprj06 | 403195 |
| Morningness | rs11174781 | 12 | 63516126 | T | C | 0.877633 | 0.047521 | 0.006875 | 3.90E-12 | TRUE | reported | Sprj06 | 403195 |
| Morningness | rs7959983 | 12 | 90452978 | T | C | 0.595837 | -0.03183 | 0.004576 | 4.70E-12 | TRUE | reported | Sprj06 | 403195 |
| Morningness | rs7304278 | 12 | 106989915 | A | G | 0.274962 | -0.03278 | 0.005068 | 9.60E-11 | TRUE | reported | Sprj06 | 403195 |
| Morningness | rs9597241 | 13 | 56281271 | A | C | 0.811186 | 0.032248 | 0.005794 | 2.70E-08 | TRUE | reported | Sprj06 | 403195 |
| Morningness | rs9573971 | 13 | 77568732 | A | G | 0.966149 | 0.108483 | 0.012474 | 4.90E-18 | TRUE | reported | Sprj06 | 403195 |
| Morningness | rs558539957 | 13 | 77601295 | A | G | 0.99371 | 0.23177 | 0.030104 | 2.90E-14 | TRUE | reported | Sprj06 | 403195 |
| Morningness | rs11841335 | 13 | 94105884 | G | A | 0.746028 | 0.028376 | 0.005185 | 4.00E-08 | TRUE | reported | Sprj06 | 403195 |
| Morningness | rs10149448 | 14 | 84253271 | A | G | 0.603659 | 0.027232 | 0.004616 | 5.60E-09 | TRUE | reported | Sprj06 | 403195 |
| Morningness | rs12927162 | 16 | 52684916 | A | G | 0.721652 | 0.045982 | 0.005031 | 2.00E-20 | TRUE | reported | Sprj06 | 403195 |
| Morningness | rs1421085 | 16 | 53800954 | T | C | 0.59687 | -0.04163 | 0.004595 | 1.80E-19 | TRUE | reported | Sprj06 | 403195 |
| Morningness | rs62046253 | 16 | 60644621 | C | T | 0.655839 | -0.02997 | 0.004739 | 1.40E-10 | TRUE | reported | Sprj06 | 403195 |
| Morningness | rs11645898 | 16 | 72229532 | T | C | 0.832897 | 0.03567 | 0.006042 | 1.80E-09 | TRUE | reported | Sprj06 | 403195 |
| Morningness | rs2518022 | 17 | 8057367 | T | C | 0.083527 | 0.062669 | 0.008138 | 7.60E-15 | TRUE | reported | Sprj06 | 403195 |
| Morningness | rs3760185 | 17 | 17401736 | C | T | 0.751597 | 0.037122 | 0.005277 | 2.10E-12 | TRUE | reported | Sprj06 | 403195 |
| Morningness | rs72829936 | 17 | 34060115 | G | A | 0.836049 | -0.03523 | 0.00611 | 5.50E-09 | TRUE | reported | Sprj06 | 403195 |
| Morningness | rs35653190 | 17 | 46077967 | C | T | 0.771778 | 0.030356 | 0.005408 | 2.00E-08 | TRUE | reported | Sprj06 | 403195 |
| Morningness | rs17682747 | 17 | 61181112 | G | A | 0.767481 | -0.03055 | 0.005346 | 8.70E-09 | TRUE | reported | Sprj06 | 403195 |
| Morningness | rs2949923 | 17 | 65475228 | A | G | 0.538655 | -0.02655 | 0.004529 | 4.20E-09 | TRUE | reported | Sprj06 | 403195 |
| Morningness | rs62082401 | 18 | 5186019 | C | G | 0.809399 | -0.04337 | 0.005742 | 1.20E-14 | TRUE | reported | Sprj06 | 403195 |
| Morningness | rs4239386 | 18 | 31664710 | T | A | 0.665044 | 0.034317 | 0.004786 | 4.20E-13 | TRUE | reported | Sprj06 | 403195 |
| Morningness | rs12969848 | 18 | 38152835 | C | T | 0.470293 | -0.0362 | 0.00453 | 2.60E-15 | TRUE | reported | Sprj06 | 403195 |
| Morningness | rs9962650 | 18 | 53574043 | C | G | 0.576796 | -0.02639 | 0.00457 | 5.80E-09 | TRUE | reported | Sprj06 | 403195 |
| Morningness | rs9964420 | 18 | 56824041 | C | A | 0.695679 | 0.040612 | 0.004923 | 2.40E-16 | TRUE | reported | Sprj06 | 403195 |
| Morningness | rs11152350 | 18 | 60240352 | A | C | 0.470982 | -0.02799 | 0.004517 | 6.40E-10 | TRUE | reported | Sprj06 | 403195 |
| Morningness | rs66978877 | 19 | 18455657 | T | C | 0.733224 | 0.028012 | 0.005112 | 2.70E-08 | TRUE | reported | Sprj06 | 403195 |
| Morningness | rs11670534 | 19 | 47003906 | C | T | 0.834403 | 0.032873 | 0.006084 | 4.70E-08 | TRUE | reported | Sprj06 | 403195 |
| Morningness | rs78095690 | 20 | 16239683 | T | C | 0.564251 | -0.02759 | 0.004561 | 1.10E-09 | TRUE | reported | Sprj06 | 403195 |
| Morningness | rs2072727 | 20 | 43538733 | T | C | 0.4361 | 0.027837 | 0.004551 | 5.60E-10 | TRUE | reported | Sprj06 | 403195 |
| Morningness | rs139911 | 22 | 40704052 | C | T | 0.42411 | 0.037707 | 0.004578 | 2.20E-16 | TRUE | reported | Sprj06 | 403195 |
| Morningness | rs4822107 | 22 | 42704834 | G | A | 0.494268 | -0.02784 | 0.004536 | 8.70E-10 | TRUE | reported | Sprj06 | 403195 |
| Daytime nap | rs2786547 | 1 | 33342304 | T | C | 0.176896 | -0.01077 | 0.001588 | 1.00E-11 | TRUE | reported | ebi-a-GCST011494 | 452633 |
| Daytime nap | rs6665690 | 1 | 162836235 | C | A | 0.170043 | -0.00924 | 0.001615 | 6.00E-09 | TRUE | reported | ebi-a-GCST011494 | 452633 |
| Daytime nap | rs12140153 | 1 | 62579891 | T | G | 0.095397 | -0.02471 | 0.002116 | 2.40E-31 | TRUE | reported | ebi-a-GCST011494 | 452633 |
| Daytime nap | rs35039375 | 1 | 171516863 | G | A | 0.091832 | 0.013643 | 0.00211 | 8.70E-11 | TRUE | reported | ebi-a-GCST011494 | 452633 |
| Daytime nap | rs301817 | 1 | 8503379 | A | C | 0.5894 | 0.007344 | 0.001237 | 1.60E-09 | TRUE | reported | ebi-a-GCST011494 | 452633 |
| Daytime nap | rs11383197 | 1 | 34998659 | AG | A | 0.675376 | 0.00719 | 0.001295 | 2.70E-08 | TRUE | reported | ebi-a-GCST011494 | 452633 |
| Daytime nap | rs35549521 | 1 | 46028185 | CT | C | 0.430107 | -0.00737 | 0.001277 | 1.50E-08 | TRUE | reported | ebi-a-GCST011494 | 452633 |
| Daytime nap | rs1931175 | 1 | 96928273 | G | C | 0.383828 | 0.007763 | 0.001248 | 4.60E-10 | TRUE | reported | ebi-a-GCST011494 | 452633 |
| Daytime nap | rs12042846 | 1 | 98667103 | C | T | 0.178874 | 0.009015 | 0.00159 | 1.90E-08 | TRUE | reported | ebi-a-GCST011494 | 452633 |
| Daytime nap | rs200435329 | 1 | 174316633 | T | G | 0.237916 | 0.009863 | 0.001438 | 9.90E-12 | TRUE | reported | ebi-a-GCST011494 | 452633 |
| Daytime nap | rs2250377 | 1 | 201860626 | G | A | 0.661117 | -0.01316 | 0.00128 | 1.40E-24 | TRUE | reported | ebi-a-GCST011494 | 452633 |
| Daytime nap | rs13033444 | 2 | 23611438 | G | A | 0.282805 | 0.009742 | 0.00135 | 3.60E-13 | TRUE | reported | ebi-a-GCST011494 | 452633 |
| Daytime nap | rs75022160 | 2 | 25311861 | T | C | 0.137254 | -0.00988 | 0.001769 | 1.70E-08 | TRUE | reported | ebi-a-GCST011494 | 452633 |
| Daytime nap | rs9287862 | 2 | 151500518 | T | C | 0.913226 | -0.01225 | 0.002152 | 2.00E-08 | TRUE | reported | ebi-a-GCST011494 | 452633 |
| Daytime nap | rs2202323 | 2 | 49408317 | C | G | 0.634126 | -0.00759 | 0.001258 | 1.20E-09 | TRUE | reported | ebi-a-GCST011494 | 452633 |
| Daytime nap | rs7423968 | 2 | 59467016 | G | A | 0.428827 | -0.00768 | 0.001232 | 4.80E-10 | TRUE | reported | ebi-a-GCST011494 | 452633 |
| Daytime nap | rs80163246 | 2 | 164574344 | C | T | 0.117455 | 0.011913 | 0.001884 | 1.40E-10 | TRUE | reported | ebi-a-GCST011494 | 452633 |
| Daytime nap | rs7422655 | 2 | 208941004 | T | C | 0.736885 | -0.00783 | 0.001378 | 1.10E-08 | TRUE | reported | ebi-a-GCST011494 | 452633 |
| Daytime nap | rs908442 | 2 | 236800163 | T | A | 0.408654 | -0.01028 | 0.001236 | 1.40E-16 | TRUE | reported | ebi-a-GCST011494 | 452633 |
| Daytime nap | rs9309116 | 2 | 44557919 | T | C | 0.652831 | 0.007379 | 0.001273 | 3.90E-09 | TRUE | reported | ebi-a-GCST011494 | 452633 |
| Daytime nap | rs62189006 | 2 | 162573586 | G | A | 0.092801 | -0.01209 | 0.002098 | 8.30E-09 | TRUE | reported | ebi-a-GCST011494 | 452633 |
| Daytime nap | rs350785 | 2 | 52934600 | C | T | 0.884524 | -0.01265 | 0.00191 | 1.50E-11 | TRUE | reported | ebi-a-GCST011494 | 452633 |
| Daytime nap | rs11682175 | 2 | 57987593 | C | T | 0.472864 | 0.006958 | 0.001217 | 1.10E-08 | TRUE | reported | ebi-a-GCST011494 | 452633 |
| Daytime nap | rs12992648 | 2 | 206843819 | G | A | 0.282932 | -0.00765 | 0.001347 | 2.40E-08 | TRUE | reported | ebi-a-GCST011494 | 452633 |
| Daytime nap | rs4511908 | 3 | 82770852 | G | T | 0.580907 | 0.007263 | 0.001283 | 1.40E-08 | TRUE | reported | ebi-a-GCST011494 | 452633 |
| Daytime nap | rs1601440 | 3 | 84665393 | T | C | 0.721378 | -0.00913 | 0.001356 | 1.90E-11 | TRUE | reported | ebi-a-GCST011494 | 452633 |
| Daytime nap | rs76824303 | 3 | 62459819 | C | A | 0.099416 | -0.0118 | 0.002077 | 1.70E-08 | TRUE | reported | ebi-a-GCST011494 | 452633 |
| Daytime nap | rs2699869 | 3 | 133032892 | C | A | 0.545872 | -0.00678 | 0.001218 | 3.10E-08 | TRUE | reported | ebi-a-GCST011494 | 452633 |
| Daytime nap | rs150538418 | 3 | 138064170 | GT | G | 0.215983 | -0.00889 | 0.001519 | 7.20E-09 | TRUE | reported | ebi-a-GCST011494 | 452633 |
| Daytime nap | rs77154532 | 3 | 19377311 | G | A | 0.358326 | -0.00769 | 0.001271 | 1.40E-09 | TRUE | reported | ebi-a-GCST011494 | 452633 |
| Daytime nap | rs936944 | 3 | 44385814 | A | G | 0.837821 | -0.00914 | 0.001644 | 3.20E-08 | TRUE | reported | ebi-a-GCST011494 | 452633 |
| Daytime nap | rs1001817 | 3 | 183995341 | T | C | 0.492788 | -0.00775 | 0.001214 | 1.70E-10 | TRUE | reported | ebi-a-GCST011494 | 452633 |
| Daytime nap | rs140008192 | 4 | 152967845 | GTA | G | 0.432275 | 0.007179 | 0.001323 | 4.30E-08 | TRUE | reported | ebi-a-GCST011494 | 452633 |
| Daytime nap | rs7697461 | 4 | 79565819 | T | A | 0.742036 | 0.008201 | 0.001398 | 6.00E-09 | TRUE | reported | ebi-a-GCST011494 | 452633 |
| Daytime nap | rs76536937 | 4 | 170222592 | TA | T | 0.481142 | -0.00753 | 0.001243 | 8.00E-10 | TRUE | reported | ebi-a-GCST011494 | 452633 |
| Daytime nap | rs13150944 | 4 | 85408000 | G | A | 0.689386 | 0.008601 | 0.001322 | 6.80E-11 | TRUE | reported | ebi-a-GCST011494 | 452633 |
| Daytime nap | rs2099810 | 5 | 112030173 | G | A | 0.49693 | -0.00769 | 0.001214 | 2.80E-10 | TRUE | reported | ebi-a-GCST011494 | 452633 |
| Daytime nap | rs467897 | 5 | 102155610 | A | G | 0.677609 | -0.00956 | 0.001301 | 2.60E-13 | TRUE | reported | ebi-a-GCST011494 | 452633 |
| Daytime nap | rs12657723 | 5 | 62760828 | T | C | 0.321683 | 0.008183 | 0.001298 | 2.00E-10 | TRUE | reported | ebi-a-GCST011494 | 452633 |
| Daytime nap | rs13169872 | 5 | 62878799 | A | G | 0.319196 | 0.00714 | 0.001302 | 3.00E-08 | TRUE | reported | ebi-a-GCST011494 | 452633 |
| Daytime nap | rs2943023 | 5 | 89597733 | T | C | 0.419803 | -0.0071 | 0.001231 | 7.40E-09 | TRUE | reported | ebi-a-GCST011494 | 452633 |
| Daytime nap | rs2431108 | 5 | 103947968 | C | T | 0.328723 | 0.012983 | 0.00129 | 7.70E-24 | TRUE | reported | ebi-a-GCST011494 | 452633 |
| Daytime nap | rs6452787 | 5 | 87712831 | G | A | 0.463847 | -0.00773 | 0.001217 | 2.00E-10 | TRUE | reported | ebi-a-GCST011494 | 452633 |
| Daytime nap | rs10875606 | 5 | 143769614 | A | C | 0.684233 | -0.00738 | 0.001308 | 1.30E-08 | TRUE | reported | ebi-a-GCST011494 | 452633 |
| Daytime nap | rs10875622 | 5 | 146693062 | A | G | 0.575365 | 0.010462 | 0.001229 | 1.30E-17 | TRUE | reported | ebi-a-GCST011494 | 452633 |
| Daytime nap | rs73817091 | 5 | 159042652 | T | C | 0.042467 | 0.016513 | 0.003022 | 3.80E-08 | TRUE | reported | ebi-a-GCST011494 | 452633 |
| Daytime nap | rs140506252 | 6 | 155129280 | T | A | 0.022478 | -0.02273 | 0.004089 | 4.30E-08 | TRUE | reported | ebi-a-GCST011494 | 452633 |
| Daytime nap | rs3799380 | 6 | 26467182 | C | T | 0.200274 | -0.0089 | 0.001514 | 1.30E-08 | TRUE | reported | ebi-a-GCST011494 | 452633 |
| Daytime nap | rs61332968 | 6 | 38467487 | GA | G | 0.288661 | 0.00785 | 0.001347 | 4.20E-09 | TRUE | reported | ebi-a-GCST011494 | 452633 |
| Daytime nap | rs2653349 | 6 | 55142337 | G | A | 0.785223 | -0.01659 | 0.001478 | 3.40E-29 | TRUE | reported | ebi-a-GCST011494 | 452633 |
| Daytime nap | rs1546977 | 6 | 84314423 | G | A | 0.439655 | 0.008277 | 0.001223 | 1.00E-11 | TRUE | reported | ebi-a-GCST011494 | 452633 |
| Daytime nap | rs9389556 | 6 | 100079774 | G | C | 0.260947 | 0.008415 | 0.001383 | 9.70E-10 | TRUE | reported | ebi-a-GCST011494 | 452633 |
| Daytime nap | rs785145 | 6 | 114650655 | G | T | 0.431455 | 0.006989 | 0.001225 | 1.00E-08 | TRUE | reported | ebi-a-GCST011494 | 452633 |
| Daytime nap | rs614987 | 6 | 124920871 | C | A | 0.614205 | 0.011022 | 0.001249 | 7.50E-19 | TRUE | reported | ebi-a-GCST011494 | 452633 |
| Daytime nap | rs6919087 | 6 | 37699156 | G | T | 0.3124 | -0.01078 | 0.001311 | 1.00E-16 | TRUE | reported | ebi-a-GCST011494 | 452633 |
| Daytime nap | rs2143792 | 6 | 62182204 | A | G | 0.432469 | -0.00713 | 0.001234 | 9.10E-09 | TRUE | reported | ebi-a-GCST011494 | 452633 |
| Daytime nap | rs34262487 | 6 | 36224315 | A | C | 0.072003 | -0.01451 | 0.002355 | 1.20E-09 | TRUE | reported | ebi-a-GCST011494 | 452633 |
| Daytime nap | rs9460110 | 6 | 170621249 | C | T | 0.369782 | 0.007356 | 0.001258 | 8.40E-09 | TRUE | reported | ebi-a-GCST011494 | 452633 |
| Daytime nap | rs35851551 | 7 | 31330785 | G | A | 0.101504 | -0.01119 | 0.002027 | 3.50E-08 | TRUE | reported | ebi-a-GCST011494 | 452633 |
| Daytime nap | rs10257273 | 7 | 99188589 | T | A | 0.14931 | -0.01074 | 0.001704 | 8.90E-10 | TRUE | reported | ebi-a-GCST011494 | 452633 |
| Daytime nap | rs76257331 | 7 | 106916279 | A | G | 0.198266 | 0.008677 | 0.001522 | 1.20E-08 | TRUE | reported | ebi-a-GCST011494 | 452633 |
| Daytime nap | rs13263535 | 8 | 1175131 | T | G | 0.468536 | -0.00687 | 0.001216 | 1.60E-08 | TRUE | reported | ebi-a-GCST011494 | 452633 |
| Daytime nap | rs285815 | 8 | 106108303 | A | T | 0.544465 | -0.00753 | 0.00122 | 5.80E-10 | TRUE | reported | ebi-a-GCST011494 | 452633 |
| Daytime nap | rs351776 | 8 | 28191306 | C | A | 0.549518 | 0.007554 | 0.001221 | 8.40E-10 | TRUE | reported | ebi-a-GCST011494 | 452633 |
| Daytime nap | rs2059639 | 8 | 67381858 | T | C | 0.520557 | -0.00668 | 0.001217 | 2.40E-08 | TRUE | reported | ebi-a-GCST011494 | 452633 |
| Daytime nap | rs7814873 | 8 | 142213997 | T | C | 0.617006 | -0.00721 | 0.001264 | 1.50E-08 | TRUE | reported | ebi-a-GCST011494 | 452633 |
| Daytime nap | rs17502738 | 9 | 37441650 | C | T | 0.195889 | -0.0087 | 0.00153 | 2.00E-08 | TRUE | reported | ebi-a-GCST011494 | 452633 |
| Daytime nap | rs295278 | 9 | 86420144 | A | G | 0.394519 | -0.00788 | 0.001242 | 2.20E-10 | TRUE | reported | ebi-a-GCST011494 | 452633 |
| Daytime nap | rs971415 | 9 | 108846445 | G | A | 0.122378 | -0.01107 | 0.001851 | 1.20E-09 | TRUE | reported | ebi-a-GCST011494 | 452633 |
| Daytime nap | rs10811438 | 9 | 20962282 | C | G | 0.39342 | -0.00722 | 0.001243 | 3.20E-09 | TRUE | reported | ebi-a-GCST011494 | 452633 |
| Daytime nap | rs13284688 | 9 | 81727018 | C | T | 0.206572 | 0.015072 | 0.001499 | 1.70E-23 | TRUE | reported | ebi-a-GCST011494 | 452633 |
| Daytime nap | rs12346996 | 9 | 131840856 | C | T | 0.728071 | -0.00796 | 0.001365 | 5.00E-09 | TRUE | reported | ebi-a-GCST011494 | 452633 |
| Daytime nap | rs4604518 | 9 | 120555845 | A | G | 0.453526 | -0.00691 | 0.001221 | 1.40E-08 | TRUE | reported | ebi-a-GCST011494 | 452633 |
| Daytime nap | rs11258652 | 10 | 13868855 | A | C | 0.236815 | -0.0104 | 0.001429 | 3.70E-13 | TRUE | reported | ebi-a-GCST011494 | 452633 |
| Daytime nap | rs224111 | 10 | 64552010 | A | G | 0.387694 | -0.00798 | 0.001249 | 1.60E-10 | TRUE | reported | ebi-a-GCST011494 | 452633 |
| Daytime nap | rs10840017 | 11 | 8335754 | G | A | 0.232631 | -0.00894 | 0.001481 | 2.00E-09 | TRUE | reported | ebi-a-GCST011494 | 452633 |
| Daytime nap | rs271057 | 11 | 92769748 | T | C | 0.751573 | -0.00867 | 0.001404 | 6.50E-10 | TRUE | reported | ebi-a-GCST011494 | 452633 |
| Daytime nap | rs11224896 | 11 | 101479583 | C | T | 0.110253 | -0.01116 | 0.001939 | 1.10E-08 | TRUE | reported | ebi-a-GCST011494 | 452633 |
| Daytime nap | rs174541 | 11 | 61565908 | C | T | 0.360451 | 0.009882 | 0.001263 | 4.40E-15 | TRUE | reported | ebi-a-GCST011494 | 452633 |
| Daytime nap | rs10835420 | 11 | 28866669 | A | T | 0.249174 | -0.0089 | 0.001402 | 1.70E-10 | TRUE | reported | ebi-a-GCST011494 | 452633 |
| Daytime nap | rs60222088 | 12 | 108334477 | A | C | 0.147267 | -0.01124 | 0.001723 | 6.40E-11 | TRUE | reported | ebi-a-GCST011494 | 452633 |
| Daytime nap | rs10772659 | 12 | 13504828 | A | T | 0.442732 | 0.007311 | 0.001228 | 2.70E-09 | TRUE | reported | ebi-a-GCST011494 | 452633 |
| Daytime nap | rs35011311 | 12 | 38616581 | T | G | 0.265581 | -0.00908 | 0.001382 | 4.40E-11 | TRUE | reported | ebi-a-GCST011494 | 452633 |
| Daytime nap | rs11615756 | 12 | 117942076 | T | C | 0.404611 | 0.018267 | 0.001239 | 1.40E-49 | TRUE | reported | ebi-a-GCST011494 | 452633 |
| Daytime nap | rs2769916 | 13 | 107820389 | A | G | 0.688617 | 0.008753 | 0.001313 | 1.70E-11 | TRUE | reported | ebi-a-GCST011494 | 452633 |
| Daytime nap | rs10149986 | 14 | 29721044 | G | T | 0.185198 | 0.010938 | 0.001566 | 4.40E-12 | TRUE | reported | ebi-a-GCST011494 | 452633 |
| Daytime nap | rs2370926 | 14 | 79602542 | C | T | 0.366474 | -0.00813 | 0.001264 | 1.70E-10 | TRUE | reported | ebi-a-GCST011494 | 452633 |
| Daytime nap | rs10152428 | 15 | 93510243 | C | G | 0.729765 | 0.007807 | 0.00137 | 1.10E-08 | TRUE | reported | ebi-a-GCST011494 | 452633 |
| Daytime nap | rs11071755 | 15 | 63793936 | A | G | 0.425078 | -0.00711 | 0.001228 | 5.20E-09 | TRUE | reported | ebi-a-GCST011494 | 452633 |
| Daytime nap | rs17158413 | 15 | 83235408 | A | G | 0.237279 | 0.00925 | 0.00143 | 4.40E-11 | TRUE | reported | ebi-a-GCST011494 | 452633 |
| Daytime nap | rs9939355 | 16 | 23837048 | T | C | 0.557671 | -0.00726 | 0.001224 | 4.50E-09 | TRUE | reported | ebi-a-GCST011494 | 452633 |
| Daytime nap | rs378421 | 16 | 28754684 | A | G | 0.41729 | 0.006979 | 0.001238 | 2.40E-08 | TRUE | reported | ebi-a-GCST011494 | 452633 |
| Daytime nap | rs11860072 | 16 | 56193408 | T | C | 0.447209 | -0.00898 | 0.00124 | 2.80E-13 | TRUE | reported | ebi-a-GCST011494 | 452633 |
| Daytime nap | rs13330072 | 16 | 69402831 | G | A | 0.286953 | 0.007911 | 0.001341 | 4.80E-09 | TRUE | reported | ebi-a-GCST011494 | 452633 |
| Daytime nap | rs60920123 | 16 | 10134637 | A | G | 0.433192 | -0.00764 | 0.001227 | 4.50E-10 | TRUE | reported | ebi-a-GCST011494 | 452633 |
| Daytime nap | rs3935190 | 17 | 79084367 | A | G | 0.536252 | 0.008014 | 0.001224 | 5.40E-11 | TRUE | reported | ebi-a-GCST011494 | 452633 |
| Daytime nap | rs385199 | 17 | 43686419 | C | A | 0.227862 | -0.02091 | 0.00145 | 7.50E-47 | TRUE | reported | ebi-a-GCST011494 | 452633 |
| Daytime nap | rs112520848 | 17 | 64308310 | C | G | 0.385884 | 0.007024 | 0.001252 | 1.80E-08 | TRUE | reported | ebi-a-GCST011494 | 452633 |
| Daytime nap | rs12451365 | 17 | 35595368 | C | T | 0.204638 | 0.010628 | 0.001504 | 1.50E-12 | TRUE | reported | ebi-a-GCST011494 | 452633 |
| Daytime nap | rs962247 | 18 | 23084118 | A | G | 0.476801 | -0.00796 | 0.001225 | 5.70E-11 | TRUE | reported | ebi-a-GCST011494 | 452633 |
| Daytime nap | rs2033103 | 18 | 36097882 | T | C | 0.452115 | 0.007257 | 0.00122 | 2.60E-09 | TRUE | reported | ebi-a-GCST011494 | 452633 |
| Daytime nap | rs9965170 | 18 | 44788274 | A | G | 0.423393 | -0.01364 | 0.001229 | 7.80E-29 | TRUE | reported | ebi-a-GCST011494 | 452633 |
| Daytime nap | rs17265513 | 20 | 39832628 | C | T | 0.199401 | 0.009132 | 0.00152 | 2.00E-09 | TRUE | reported | ebi-a-GCST011494 | 452633 |
| Daytime nap | rs910187 | 20 | 45841052 | A | G | 0.373967 | -0.00732 | 0.001256 | 4.90E-09 | TRUE | reported | ebi-a-GCST011494 | 452633 |
| Daytime nap | rs3810484 | 20 | 62194103 | G | A | 0.443696 | -0.00684 | 0.001222 | 2.20E-08 | TRUE | reported | ebi-a-GCST011494 | 452633 |
| Daytime nap | rs1883048 | 21 | 47397586 | C | T | 0.523561 | 0.007871 | 0.001223 | 1.80E-10 | TRUE | reported | ebi-a-GCST011494 | 452633 |
| Daytime nap | rs2284015 | 22 | 37096573 | G | C | 0.259172 | 0.007712 | 0.001387 | 4.10E-08 | TRUE | reported | ebi-a-GCST011494 | 452633 |
| Insomnia | rs77217059 | 2 | 58989880 | A | G | 0.1498 | -0.04166 | 0.007246 | 8.76E-09 | TRUE | reported | iIWuzk | 379343 |
| Insomnia | rs11693221 | 2 | 66799986 | T | C | 0.0413 | 0.123102 | 0.01265 | 3.14E-22 | TRUE | reported | iIWuzk | 377330 |
| Insomnia | rs55683518 | 2 | 147484316 | G | T | 0.37 | -0.02933 | 0.005322 | 3.55E-08 | TRUE | reported | iIWuzk | 381157 |
| Insomnia | rs1456193 | 3 | 117637697 | T | C | 0.1801 | -0.03739 | 0.006676 | 2.13E-08 | TRUE | reported | iIWuzk | 383816 |
| Insomnia | rs77960 | 5 | 103964585 | A | G | 0.3271 | 0.032467 | 0.005429 | 1.66E-09 | TRUE | reported | iIWuzk | 382586 |
| Insomnia | rs6938026 | 6 | 43185733 | G | A | 0.2093 | 0.037296 | 0.006239 | 2.72E-09 | TRUE | reported | iIWuzk | 385182 |
| Insomnia | rs370771 | 6 | 105398086 | G | T | 0.4539 | -0.03459 | 0.005121 | 1.48E-11 | TRUE | reported | iIWuzk | 385316 |
| Insomnia | rs6984111 | 8 | 10211788 | C | T | 0.1607 | 0.043059 | 0.007393 | 4.25E-09 | TRUE | reported | iIWuzk | 386533 |
| Insomnia | rs4073582 | 11 | 66050712 | A | G | 0.3589 | -0.03118 | 0.005319 | 4.67E-09 | TRUE | reported | iIWuzk | 385580 |
| Insomnia | rs9576155 | 13 | 37600284 | A | G | 0.3392 | 0.030529 | 0.005384 | 9.26E-09 | TRUE | reported | iIWuzk | 383032 |
| Insomnia | rs6561715 | 13 | 53888526 | T | A | 0.3685 | 0.037296 | 0.005302 | 1.71E-12 | TRUE | reported | iIWuzk | 381541 |
| Insomnia | rs4986172 | 17 | 43216281 | T | C | 0.342 | 0.037296 | 0.005357 | 5.20E-12 | TRUE | reported | iIWuzk | 386533 |
| Insomnia | rs7228159 | 18 | 53104253 | A | T | 0.3427 | 0.029559 | 0.005354 | 4.08E-08 | TRUE | reported | iIWuzk | 385746 |
| Sleep duration | rs915416 | 1 | 34731984 | C | G | 0.289947 | 0.019259 | 0.002495 | 9.90E-15 | TRUE | reported | n1X25x | 446118 |
| Sleep duration | rs269054 | 1 | 57864304 | T | A | 0.577924 | -0.01364 | 0.002293 | 2.10E-09 | TRUE | reported | n1X25x | 446118 |
| Sleep duration | rs61796569 | 1 | 66476437 | C | T | 0.730417 | -0.01544 | 0.002564 | 1.50E-09 | TRUE | reported | n1X25x | 446118 |
| Sleep duration | rs12567114 | 1 | 98527951 | G | A | 0.724198 | -0.01483 | 0.00254 | 4.30E-09 | TRUE | reported | n1X25x | 446118 |
| Sleep duration | rs62120041 | 2 | 9185564 | T | C | 0.933902 | 0.026111 | 0.004575 | 9.60E-09 | TRUE | reported | n1X25x | 446118 |
| Sleep duration | rs374153 | 2 | 40382712 | C | T | 0.158085 | 0.017612 | 0.003103 | 9.10E-09 | TRUE | reported | n1X25x | 446118 |
| Sleep duration | rs2717076 | 2 | 58061127 | C | T | 0.372584 | -0.01841 | 0.002341 | 3.10E-15 | TRUE | reported | n1X25x | 446118 |
| Sleep duration | rs75539574 | 2 | 58871658 | A | C | 0.914208 | -0.03625 | 0.004065 | 6.90E-19 | TRUE | reported | n1X25x | 446118 |
| Sleep duration | rs7556815 | 2 | 114085785 | G | A | 0.780856 | -0.04072 | 0.00274 | 1.30E-49 | TRUE | reported | n1X25x | 446118 |
| Sleep duration | rs35662245 | 2 | 147583187 | T | A | 0.661256 | -0.0146 | 0.002393 | 1.40E-09 | TRUE | reported | n1X25x | 446118 |
| Sleep duration | rs11885663 | 2 | 166944004 | C | T | 0.752191 | -0.01622 | 0.002618 | 8.60E-10 | TRUE | reported | n1X25x | 446118 |
| Sleep duration | rs10173260 | 2 | 210377845 | T | C | 0.393765 | -0.01284 | 0.002313 | 2.90E-08 | TRUE | reported | n1X25x | 446118 |
| Sleep duration | rs112230981 | 3 | 55879269 | A | G | 0.94984 | 0.031528 | 0.005228 | 2.20E-09 | TRUE | reported | n1X25x | 446118 |
| Sleep duration | rs17732997 | 3 | 70470834 | C | G | 0.569098 | 0.012935 | 0.002288 | 1.20E-08 | TRUE | reported | n1X25x | 446118 |
| Sleep duration | rs7644809 | 3 | 107564459 | T | C | 0.421606 | 0.013062 | 0.002301 | 1.60E-08 | TRUE | reported | n1X25x | 446118 |
| Sleep duration | rs13088093 | 3 | 135838598 | T | G | 0.663683 | -0.01627 | 0.002402 | 7.00E-12 | TRUE | reported | n1X25x | 446118 |
| Sleep duration | rs2192528 | 4 | 18327896 | A | G | 0.480065 | 0.013369 | 0.002269 | 2.70E-09 | TRUE | reported | n1X25x | 446118 |
| Sleep duration | rs17427571 | 4 | 82254908 | A | G | 0.684313 | 0.013826 | 0.002435 | 1.30E-08 | TRUE | reported | n1X25x | 446118 |
| Sleep duration | rs35531607 | 4 | 92533225 | T | C | 0.525917 | -0.01284 | 0.002273 | 1.50E-08 | TRUE | reported | n1X25x | 446118 |
| Sleep duration | rs13109404 | 4 | 102896591 | T | G | 0.928024 | 0.031204 | 0.004408 | 1.40E-12 | TRUE | reported | n1X25x | 446118 |
| Sleep duration | rs365663 | 5 | 1428883 | A | G | 0.545963 | 0.014629 | 0.002279 | 1.00E-10 | TRUE | reported | n1X25x | 446118 |
| Sleep duration | rs465700 | 5 | 3126493 | C | G | 0.107834 | 0.022515 | 0.003674 | 1.40E-09 | TRUE | reported | n1X25x | 446118 |
| Sleep duration | rs56372231 | 5 | 102321905 | C | T | 0.665907 | -0.01694 | 0.0024 | 2.20E-12 | TRUE | reported | n1X25x | 446118 |
| Sleep duration | rs11567976 | 5 | 137654218 | C | T | 0.429092 | -0.0128 | 0.002285 | 2.10E-08 | TRUE | reported | n1X25x | 446118 |
| Sleep duration | rs151014368 | 5 | 176751059 | G | A | 0.793742 | -0.01609 | 0.00282 | 9.10E-09 | TRUE | reported | n1X25x | 446118 |
| Sleep duration | rs34556183 | 6 | 28584775 | A | G | 0.719606 | 0.016923 | 0.002523 | 2.30E-11 | TRUE | reported | n1X25x | 446118 |
| Sleep duration | rs113113059 | 6 | 43160375 | T | C | 0.78 | 0.016141 | 0.002737 | 8.40E-09 | TRUE | reported | n1X25x | 446118 |
| Sleep duration | rs9382445 | 6 | 54937974 | T | C | 0.62305 | 0.014536 | 0.002334 | 4.80E-10 | TRUE | reported | n1X25x | 446118 |
| Sleep duration | rs2231265 | 6 | 89790201 | A | G | 0.227711 | -0.01496 | 0.002699 | 2.70E-08 | TRUE | reported | n1X25x | 446118 |
| Sleep duration | rs9345234 | 6 | 93162639 | A | C | 0.421984 | -0.01301 | 0.002299 | 1.80E-08 | TRUE | reported | n1X25x | 446118 |
| Sleep duration | rs34731055 | 7 | 2106928 | C | T | 0.81911 | -0.01946 | 0.002948 | 3.70E-11 | TRUE | reported | n1X25x | 446118 |
| Sleep duration | rs2079070 | 7 | 114126432 | C | G | 0.264613 | 0.017548 | 0.002566 | 7.50E-12 | TRUE | reported | n1X25x | 446118 |
| Sleep duration | rs7806045 | 7 | 132610266 | T | C | 0.754703 | 0.014792 | 0.002626 | 1.40E-08 | TRUE | reported | n1X25x | 446118 |
| Sleep duration | rs2001329 | 8 | 10986859 | C | T | 0.486323 | 0.013968 | 0.002269 | 1.20E-09 | TRUE | reported | n1X25x | 446118 |
| Sleep duration | rs73219758 | 8 | 14279446 | G | A | 0.708064 | 0.016401 | 0.002495 | 5.60E-11 | TRUE | reported | n1X25x | 446118 |
| Sleep duration | rs10973207 | 9 | 37100525 | G | T | 0.842323 | -0.02043 | 0.003124 | 6.00E-11 | TRUE | reported | n1X25x | 446118 |
| Sleep duration | rs1776776 | 9 | 140497072 | T | C | 0.873832 | 0.019963 | 0.003411 | 4.90E-09 | TRUE | reported | n1X25x | 446118 |
| Sleep duration | rs12246842 | 10 | 21830580 | A | G | 0.459815 | 0.013395 | 0.002274 | 3.90E-09 | TRUE | reported | n1X25x | 446118 |
| Sleep duration | rs10761674 | 10 | 64618340 | C | T | 0.477334 | 0.012333 | 0.002266 | 4.20E-08 | TRUE | reported | n1X25x | 446118 |
| Sleep duration | rs11190970 | 10 | 103128332 | G | A | 0.798661 | 0.015379 | 0.002823 | 4.60E-08 | TRUE | reported | n1X25x | 446118 |
| Sleep duration | rs7915425 | 10 | 125016501 | T | C | 0.174682 | 0.019064 | 0.00299 | 2.00E-10 | TRUE | reported | n1X25x | 446118 |
| Sleep duration | rs1517572 | 11 | 28829882 | A | C | 0.419464 | -0.01464 | 0.002295 | 1.50E-10 | TRUE | reported | n1X25x | 446118 |
| Sleep duration | rs4592416 | 11 | 43800474 | A | G | 0.535593 | -0.01468 | 0.00227 | 9.30E-11 | TRUE | reported | n1X25x | 446118 |
| Sleep duration | rs11039544 | 11 | 48173412 | G | A | 0.837779 | 0.018389 | 0.003074 | 1.90E-09 | TRUE | reported | n1X25x | 446118 |
| Sleep duration | rs174560 | 11 | 61581764 | T | C | 0.685785 | -0.01358 | 0.002437 | 2.80E-08 | TRUE | reported | n1X25x | 446118 |
| Sleep duration | rs12791153 | 11 | 80685181 | A | T | 0.918911 | -0.02355 | 0.004217 | 1.90E-08 | TRUE | reported | n1X25x | 446118 |
| Sleep duration | rs1553132 | 11 | 88297740 | A | G | 0.741567 | -0.01451 | 0.002584 | 2.50E-08 | TRUE | reported | n1X25x | 446118 |
| Sleep duration | rs1939455 | 11 | 101520886 | G | T | 0.879446 | 0.020425 | 0.003561 | 1.20E-08 | TRUE | reported | n1X25x | 446118 |
| Sleep duration | rs1079727 | 11 | 113289182 | T | C | 0.842182 | -0.01829 | 0.003103 | 5.30E-09 | TRUE | reported | n1X25x | 446118 |
| Sleep duration | rs1057703 | 11 | 122830251 | T | G | 0.853392 | -0.0194 | 0.003207 | 1.10E-09 | TRUE | reported | n1X25x | 446118 |
| Sleep duration | rs34354917 | 12 | 38764559 | C | A | 0.710472 | 0.013746 | 0.002501 | 3.90E-08 | TRUE | reported | n1X25x | 446118 |
| Sleep duration | rs4767550 | 12 | 117951150 | A | G | 0.585862 | -0.0143 | 0.00231 | 6.30E-10 | TRUE | reported | n1X25x | 446118 |
| Sleep duration | rs6575005 | 14 | 26954078 | T | C | 0.757854 | 0.015564 | 0.002642 | 4.40E-09 | TRUE | reported | n1X25x | 446118 |
| Sleep duration | rs10483350 | 14 | 29816155 | A | G | 0.804582 | -0.01737 | 0.002868 | 1.50E-09 | TRUE | reported | n1X25x | 446118 |
| Sleep duration | rs61985058 | 14 | 60233841 | C | T | 0.856824 | -0.01859 | 0.003229 | 1.30E-08 | TRUE | reported | n1X25x | 446118 |
| Sleep duration | rs55658675 | 14 | 65554638 | C | T | 0.644938 | 0.013142 | 0.002369 | 2.00E-08 | TRUE | reported | n1X25x | 446118 |
| Sleep duration | rs11621908 | 14 | 78495761 | C | T | 0.917141 | 0.024095 | 0.004163 | 5.60E-09 | TRUE | reported | n1X25x | 446118 |
| Sleep duration | rs8038326 | 15 | 47989799 | A | G | 0.72691 | 0.01592 | 0.002541 | 2.80E-10 | TRUE | reported | n1X25x | 446118 |
| Sleep duration | rs3095508 | 16 | 6550400 | C | A | 0.593529 | 0.015352 | 0.002304 | 3.10E-11 | TRUE | reported | n1X25x | 446118 |
| Sleep duration | rs11643715 | 16 | 23909538 | C | G | 0.709058 | -0.0139 | 0.002497 | 3.20E-08 | TRUE | reported | n1X25x | 446118 |
| Sleep duration | rs9937053 | 16 | 53799507 | G | A | 0.576695 | 0.016935 | 0.00229 | 1.20E-13 | TRUE | reported | n1X25x | 446118 |
| Sleep duration | rs7198661 | 16 | 56090428 | T | C | 0.502318 | 0.013383 | 0.002274 | 3.90E-09 | TRUE | reported | n1X25x | 446118 |
| Sleep duration | rs3027234 | 17 | 8136092 | C | T | 0.772849 | 0.015154 | 0.002706 | 2.30E-08 | TRUE | reported | n1X25x | 446118 |
| Sleep duration | rs205024 | 17 | 11227352 | C | T | 0.616265 | -0.01383 | 0.002327 | 3.90E-09 | TRUE | reported | n1X25x | 446118 |
| Sleep duration | rs8072993 | 17 | 21335627 | T | G | 0.363492 | -0.01748 | 0.002822 | 4.20E-10 | TRUE | reported | n1X25x | 446118 |
| Sleep duration | rs75606464 | 17 | 21337440 | A | C | 0.279974 | -0.01808 | 0.002658 | 8.60E-12 | TRUE | reported | n1X25x | 446118 |
| Sleep duration | rs147114641 | 17 | 43581015 | C | A | 0.773722 | 0.01598 | 0.002704 | 3.10E-09 | TRUE | reported | n1X25x | 446118 |
| Sleep duration | rs188898356 | 17 | 43673273 | G | T | 0.774118 | 0.015853 | 0.002723 | 5.60E-09 | TRUE | reported | n1X25x | 446118 |
| Sleep duration | rs549456208 | 17 | 43675593 | G | A | 0.775614 | 0.015975 | 0.002719 | 3.70E-09 | TRUE | reported | n1X25x | 446118 |
| Sleep duration | rs541401842 | 17 | 43678163 | A | T | 0.774095 | 0.015689 | 0.002712 | 6.40E-09 | TRUE | reported | n1X25x | 446118 |
| Sleep duration | rs530675904 | 17 | 43678312 | C | T | 0.771929 | 0.015939 | 0.002708 | 3.70E-09 | TRUE | reported | n1X25x | 446118 |
| Sleep duration | rs566367100 | 17 | 43678634 | A | G | 0.774333 | 0.015827 | 0.002712 | 4.80E-09 | TRUE | reported | n1X25x | 446118 |
| Sleep duration | rs556349132 | 17 | 43683284 | G | A | 0.764006 | 0.016191 | 0.002701 | 1.80E-09 | TRUE | reported | n1X25x | 446118 |
| Sleep duration | rs191729791 | 17 | 43707954 | C | A | 0.774471 | 0.015845 | 0.002709 | 4.40E-09 | TRUE | reported | n1X25x | 446118 |
| Sleep duration | rs551853625 | 17 | 43730154 | A | T | 0.774125 | 0.015703 | 0.002706 | 5.70E-09 | TRUE | reported | n1X25x | 446118 |
| Sleep duration | rs186085644 | 17 | 43787707 | T | A | 0.778463 | 0.015946 | 0.002736 | 4.90E-09 | TRUE | reported | n1X25x | 446118 |
| Sleep duration | rs533456705 | 17 | 43804890 | G | A | 0.779028 | 0.015816 | 0.002744 | 7.70E-09 | TRUE | reported | n1X25x | 446118 |
| Sleep duration | rs529654543 | 17 | 43810773 | G | C | 0.232519 | -0.01517 | 0.002694 | 1.60E-08 | TRUE | reported | n1X25x | 446118 |
| Sleep duration | rs182764646 | 17 | 43819963 | C | T | 0.775363 | 0.015579 | 0.002711 | 8.00E-09 | TRUE | reported | n1X25x | 446118 |
| Sleep duration | rs150871399 | 17 | 43871537 | C | T | 0.779944 | 0.01601 | 0.002756 | 5.70E-09 | TRUE | reported | n1X25x | 446118 |
| Sleep duration | rs543672294 | 17 | 43952842 | G | A | 0.782216 | 0.015886 | 0.002772 | 8.90E-09 | TRUE | reported | n1X25x | 446118 |
| Sleep duration | rs553548824 | 17 | 44102080 | C | T | 0.775277 | 0.015598 | 0.002712 | 7.90E-09 | TRUE | reported | n1X25x | 446118 |
| Sleep duration | rs562498082 | 17 | 44119551 | G | A | 0.774959 | 0.015767 | 0.002709 | 5.20E-09 | TRUE | reported | n1X25x | 446118 |
| Sleep duration | rs544457684 | 17 | 44130562 | T | C | 0.783907 | 0.016025 | 0.002783 | 7.90E-09 | TRUE | reported | n1X25x | 446118 |
| Sleep duration | rs189444347 | 17 | 44149231 | T | A | 0.775107 | 0.015775 | 0.002709 | 5.20E-09 | TRUE | reported | n1X25x | 446118 |
| Sleep duration | rs183075470 | 17 | 44177979 | T | C | 0.781253 | 0.015305 | 0.002759 | 2.60E-08 | TRUE | reported | n1X25x | 446118 |
| Sleep duration | rs544152744 | 17 | 44178141 | G | A | 0.77511 | 0.015732 | 0.002709 | 5.70E-09 | TRUE | reported | n1X25x | 446118 |
| Sleep duration | rs534630126 | 17 | 44192705 | C | G | 0.776939 | 0.01543 | 0.002726 | 1.30E-08 | TRUE | reported | n1X25x | 446118 |
| Sleep duration | rs538067853 | 17 | 44203423 | T | C | 0.773375 | 0.015737 | 0.002707 | 5.30E-09 | TRUE | reported | n1X25x | 446118 |
| Sleep duration | rs562862355 | 17 | 44215632 | C | G | 0.775809 | 0.015935 | 0.002718 | 4.10E-09 | TRUE | reported | n1X25x | 446118 |
| Sleep duration | rs560306651 | 17 | 44216531 | A | G | 0.777106 | 0.016097 | 0.002726 | 3.10E-09 | TRUE | reported | n1X25x | 446118 |
| Sleep duration | rs555816665 | 17 | 44226977 | T | G | 0.775608 | 0.015723 | 0.002712 | 6.20E-09 | TRUE | reported | n1X25x | 446118 |
| Sleep duration | rs562611463 | 17 | 44229341 | C | T | 0.785822 | 0.015374 | 0.002799 | 3.70E-08 | TRUE | reported | n1X25x | 446118 |
| Sleep duration | rs538023027 | 17 | 44234184 | G | A | 0.774075 | 0.015779 | 0.00271 | 5.10E-09 | TRUE | reported | n1X25x | 446118 |
| Sleep duration | rs575489776 | 17 | 44248149 | T | C | 0.824882 | 0.017587 | 0.003206 | 3.70E-08 | TRUE | reported | n1X25x | 446118 |
| Sleep duration | rs571820767 | 17 | 44274486 | A | C | 0.771297 | 0.015796 | 0.002713 | 5.20E-09 | TRUE | reported | n1X25x | 446118 |
| Sleep duration | rs545516641 | 17 | 44281154 | T | G | 0.775996 | 0.016 | 0.00272 | 3.60E-09 | TRUE | reported | n1X25x | 446118 |
| Sleep duration | rs140207579 | 17 | 44282310 | A | C | 0.7505 | 0.015249 | 0.002664 | 8.50E-09 | TRUE | reported | n1X25x | 446118 |
| Sleep duration | rs533390925 | 17 | 44287708 | G | A | 0.82267 | 0.017763 | 0.003179 | 2.10E-08 | TRUE | reported | n1X25x | 446118 |
| Sleep duration | rs534621058 | 17 | 44293343 | C | T | 0.81894 | 0.017997 | 0.003134 | 8.20E-09 | TRUE | reported | n1X25x | 446118 |
| Sleep duration | rs188913635 | 17 | 44302791 | G | T | 0.775278 | 0.015773 | 0.002713 | 5.40E-09 | TRUE | reported | n1X25x | 446118 |
| Sleep duration | rs528950908 | 17 | 44306369 | C | T | 0.772331 | 0.016222 | 0.002711 | 1.90E-09 | TRUE | reported | n1X25x | 446118 |
| Sleep duration | rs569772429 | 17 | 44316521 | G | A | 0.775747 | 0.01591 | 0.002714 | 4.00E-09 | TRUE | reported | n1X25x | 446118 |
| Sleep duration | rs188067191 | 17 | 44317885 | C | T | 0.775749 | 0.015919 | 0.002713 | 3.90E-09 | TRUE | reported | n1X25x | 446118 |
| Sleep duration | rs533723940 | 17 | 44324574 | T | A | 0.775846 | 0.015963 | 0.002713 | 3.50E-09 | TRUE | reported | n1X25x | 446118 |
| Sleep duration | rs2696429 | 17 | 44335274 | G | A | 0.773626 | 0.016888 | 0.002708 | 4.00E-10 | TRUE | reported | n1X25x | 446118 |
| Sleep duration | rs538006467 | 17 | 44341572 | C | T | 0.770111 | 0.016177 | 0.002712 | 2.20E-09 | TRUE | reported | n1X25x | 446118 |
| Sleep duration | rs139688356 | 17 | 44351587 | T | C | 0.769288 | 0.015675 | 0.002715 | 7.00E-09 | TRUE | reported | n1X25x | 446118 |
| Sleep duration | rs557728726 | 17 | 44352247 | C | T | 0.789647 | 0.015595 | 0.002851 | 4.00E-08 | TRUE | reported | n1X25x | 446118 |
| Sleep duration | rs548770924 | 17 | 44355775 | T | G | 0.777256 | 0.015903 | 0.002738 | 5.70E-09 | TRUE | reported | n1X25x | 446118 |
| Sleep duration | rs570793072 | 17 | 44355810 | A | C | 0.769611 | 0.016 | 0.002726 | 4.10E-09 | TRUE | reported | n1X25x | 446118 |
| Sleep duration | rs559776997 | 17 | 44355992 | A | C | 0.773233 | 0.015413 | 0.002738 | 1.70E-08 | TRUE | reported | n1X25x | 446118 |
| Sleep duration | rs575344318 | 17 | 44356917 | G | A | 0.79604 | 0.015907 | 0.002894 | 3.30E-08 | TRUE | reported | n1X25x | 446118 |
| Sleep duration | rs568788527 | 17 | 44358100 | C | G | 0.795401 | 0.015862 | 0.002894 | 3.70E-08 | TRUE | reported | n1X25x | 446118 |
| Sleep duration | rs569276991 | 17 | 44361553 | C | T | 0.796519 | 0.015848 | 0.00291 | 4.40E-08 | TRUE | reported | n1X25x | 446118 |
| Sleep duration | rs553223732 | 17 | 44361954 | G | C | 0.793648 | 0.01679 | 0.002885 | 5.30E-09 | TRUE | reported | n1X25x | 446118 |
| Sleep duration | rs564275335 | 17 | 44364046 | T | C | 0.774181 | 0.015602 | 0.002754 | 1.20E-08 | TRUE | reported | n1X25x | 446118 |
| Sleep duration | rs183607072 | 17 | 44364851 | T | G | 0.791007 | 0.017399 | 0.002855 | 9.90E-10 | TRUE | reported | n1X25x | 446118 |
| Sleep duration | rs547941836 | 17 | 44365938 | A | G | 0.777521 | 0.016457 | 0.002765 | 2.40E-09 | TRUE | reported | n1X25x | 446118 |
| Sleep duration | rs538476570 | 17 | 44369623 | A | G | 0.792693 | 0.016435 | 0.002905 | 1.30E-08 | TRUE | reported | n1X25x | 446118 |
| Sleep duration | rs527926992 | 17 | 44382257 | C | T | 0.778956 | 0.016191 | 0.002774 | 4.70E-09 | TRUE | reported | n1X25x | 446118 |
| Sleep duration | rs536102437 | 17 | 44393988 | A | T | 0.807797 | 0.016621 | 0.003028 | 3.00E-08 | TRUE | reported | n1X25x | 446118 |
| Sleep duration | rs528272240 | 17 | 44404039 | C | T | 0.797553 | 0.016205 | 0.002928 | 2.60E-08 | TRUE | reported | n1X25x | 446118 |
| Sleep duration | rs534396986 | 17 | 44579434 | T | C | 0.740266 | 0.016726 | 0.002925 | 8.90E-09 | TRUE | reported | n1X25x | 446118 |
| Sleep duration | rs547290689 | 17 | 45567907 | C | T | 0.44141 | 0.013242 | 0.002293 | 7.50E-09 | TRUE | reported | n1X25x | 446118 |
| Sleep duration | rs575112950 | 17 | 45615405 | A | G | 0.48633 | -0.01277 | 0.002269 | 2.10E-08 | TRUE | reported | n1X25x | 446118 |
| Sleep duration | rs538888421 | 17 | 45641293 | A | G | 0.485944 | -0.01278 | 0.002268 | 2.10E-08 | TRUE | reported | n1X25x | 446118 |
| Sleep duration | rs569142896 | 17 | 45677193 | T | C | 0.485948 | -0.01279 | 0.002267 | 2.00E-08 | TRUE | reported | n1X25x | 446118 |
| Sleep duration | rs12607679 | 18 | 53059748 | T | C | 0.737717 | 0.020139 | 0.002593 | 8.30E-15 | TRUE | reported | n1X25x | 446118 |
| Sleep duration | rs10421649 | 19 | 9942262 | T | A | 0.44303 | -0.0133 | 0.002295 | 6.90E-09 | TRUE | reported | n1X25x | 446118 |
| Sleep duration | rs2072727 | 20 | 43538733 | T | C | 0.43617 | 0.013243 | 0.002285 | 7.90E-09 | TRUE | reported | n1X25x | 446118 |

The table lists all single nucleotide polymorphisms (SNPs) selected as genetic instruments for the four sleep-related exposures. Abbreviations: SNP, Single nucleotide polymorphism; Chr, Chromosome; Pos, Position (GRCh37); Effect allele, The allele for which the effect is estimated; Other allele, The alternative allele; Eaf, Effect allele frequency; SE, Standard error of the effect size.

**Supplementary Table S3.** Detailed information of instrumental variables (SNPs) for alopecia subtypes.

| Chr, chromosome; Eaf, Effect allele frequency; SE, standard error; SNP, single nucleotide polymorphisms. | | | | | | | | | | | | | |
| --- | --- | --- | --- | --- | --- | --- | --- | --- | --- | --- | --- | --- | --- |
| **Exposure** | **SNP** | **Chr** | **Pos** | **Effect_allele** | **Other_allele** | **Eaf** | **Beta** | **SE** | **P-value** | **MR_keep** | **Pval_origin** | **ID** | **Sample size** |
| Alopecia areata | rs4970501 | 1 | 26578169 | A | G | 0.293478 | 0.248529 | 0.053204 | 2.99E-06 | TRUE | reported | IIPwSw | 394872 |
| Alopecia areata | rs151331695 | 1 | 1.55E+08 | A | G | 0.004001 | 1.27095 | 0.277626 | 4.70E-06 | TRUE | reported | IIPwSw | 394872 |
| Alopecia areata | rs188947455 | 1 | 2.02E+08 | A | G | 0.004827 | 1.17177 | 0.253687 | 3.86E-06 | TRUE | reported | IIPwSw | 394872 |
| Alopecia areata | rs4662987 | 2 | 1.3E+08 | C | T | 0.037781 | 0.519781 | 0.113519 | 4.68E-06 | TRUE | reported | IIPwSw | 394872 |
| Alopecia areata | rs181146922 | 5 | 10535072 | C | T | 0.007373 | 1.04149 | 0.21751 | 1.68E-06 | TRUE | reported | IIPwSw | 394872 |
| Alopecia areata | rs9273060 | 6 | 32644337 | T | A | 0.248053 | 0.27351 | 0.055798 | 9.50E-07 | TRUE | reported | IIPwSw | 394872 |
| Alopecia areata | rs9275563 | 6 | 32710135 | T | C | 0.311556 | 0.390688 | 0.051467 | 3.18E-14 | TRUE | reported | IIPwSw | 394872 |
| Alopecia areata | rs9479429 | 6 | 1.5E+08 | C | G | 0.431679 | -0.24353 | 0.05146 | 2.22E-06 | TRUE | reported | IIPwSw | 394872 |
| Alopecia areata | rs427 | 7 | 24976792 | A | G | 0.238305 | 0.262127 | 0.056236 | 3.14E-06 | TRUE | reported | IIPwSw | 394872 |
| Alopecia areata | rs142220832 | 9 | 31557656 | C | G | 0.015595 | -1.45615 | 0.311828 | 3.02E-06 | TRUE | reported | IIPwSw | 394872 |
| Alopecia areata | rs143080213 | 9 | 1.24E+08 | T | C | 0.001602 | 1.71759 | 0.349558 | 8.94E-07 | TRUE | reported | IIPwSw | 394872 |
| Alopecia areata | rs143618476 | 9 | 1.36E+08 | A | G | 0.007666 | 1.00053 | 0.211033 | 2.13E-06 | TRUE | reported | IIPwSw | 394872 |
| Alopecia areata | rs186496526 | 11 | 33083278 | A | G | 0.005418 | 1.14412 | 0.247999 | 3.96E-06 | TRUE | reported | IIPwSw | 394872 |
| Alopecia areata | rs142810656 | 12 | 3058477 | T | G | 0.125799 | 0.35344 | 0.071749 | 8.39E-07 | TRUE | reported | IIPwSw | 394872 |
| Alopecia areata | rs77029915 | 12 | 11834493 | G | A | 0.00171 | 1.69704 | 0.355446 | 1.80E-06 | TRUE | reported | IIPwSw | 394872 |
| Alopecia areata | rs9592431 | 13 | 34346706 | A | G | 0.002783 | 1.40931 | 0.304109 | 3.58E-06 | TRUE | reported | IIPwSw | 394872 |
| Alopecia areata | rs28637800 | 16 | 53389677 | A | G | 0.069371 | 0.407379 | 0.089139 | 4.87E-06 | TRUE | reported | IIPwSw | 394872 |
| Androgenic alopecia | rs545623624 | 5 | 1.51E+08 | G | T | 0.003077 | 1.93654 | 0.414992 | 3.06E-06 | TRUE | reported | cLW19I | 219469 |
| Androgenic alopecia | rs143237428 | 7 | 27131527 | T | A | 0.008324 | 1.46341 | 0.305527 | 1.67E-06 | TRUE | reported | cLW19I | 219469 |
| Androgenic alopecia | rs187031337 | 7 | 1.06E+08 | A | G | 0.001897 | 2.2424 | 0.474352 | 2.28E-06 | TRUE | reported | cLW19I | 219469 |
| Androgenic alopecia | rs74670764 | 7 | 1.32E+08 | T | C | 0.008566 | 1.4933 | 0.308815 | 1.33E-06 | TRUE | reported | cLW19I | 219469 |
| Androgenic alopecia | rs4461062 | 16 | 56830706 | T | C | 0.351652 | 0.436327 | 0.090385 | 1.38E-06 | TRUE | reported | cLW19I | 219469 |
| Scarring alopecia | rs115034511 | 1 | 64440533 | G | T | 0.024225 | 0.933691 | 0.21929 | 2.06E-05 | TRUE | reported | uHjlmt | 394314 |
| Scarring alopecia | rs566842 | 1 | 1.76E+08 | G | A | 0.591976 | 0.393005 | 0.096588 | 4.72E-05 | TRUE | reported | uHjlmt | 394314 |
| Scarring alopecia | rs13081063 | 3 | 24123019 | G | A | 0.051376 | 0.696684 | 0.16946 | 3.94E-05 | TRUE | reported | uHjlmt | 394314 |
| Scarring alopecia | rs149729923 | 3 | 1E+08 | G | T | 0.020982 | 1.027 | 0.230604 | 8.45E-06 | TRUE | reported | uHjlmt | 394314 |
| Scarring alopecia | rs13184745 | 5 | 1.71E+08 | G | A | 0.282442 | -0.44566 | 0.108947 | 4.30E-05 | TRUE | reported | uHjlmt | 394314 |
| Scarring alopecia | rs6909607 | 6 | 32335895 | A | T | 0.054736 | 0.691851 | 0.164367 | 2.56E-05 | TRUE | reported | uHjlmt | 394314 |
| Scarring alopecia | rs111610382 | 6 | 1.59E+08 | G | T | 0.035481 | -1.80981 | 0.417936 | 1.49E-05 | TRUE | reported | uHjlmt | 394314 |
| Scarring alopecia | rs10229866 | 7 | 21824253 | C | T | 0.142439 | 0.494164 | 0.117337 | 2.54E-05 | TRUE | reported | uHjlmt | 394314 |
| Scarring alopecia | rs4728630 | 7 | 86287045 | G | T | 0.010774 | 1.20182 | 0.292483 | 3.97E-05 | TRUE | reported | uHjlmt | 394314 |
| Scarring alopecia | rs56840673 | 8 | 6287862 | A | G | 0.052851 | 0.727893 | 0.167498 | 1.39E-05 | TRUE | reported | uHjlmt | 394314 |
| Scarring alopecia | rs12678270 | 8 | 19422641 | A | C | 0.175885 | 0.449972 | 0.110556 | 4.70E-05 | TRUE | reported | uHjlmt | 394314 |
| Scarring alopecia | rs35326857 | 10 | 1.21E+08 | G | T | 0.628862 | -0.40667 | 0.091815 | 9.46E-06 | TRUE | reported | uHjlmt | 394314 |
| Scarring alopecia | rs186757352 | 11 | 1.34E+08 | T | C | 0.01007 | 1.4142 | 0.302278 | 2.89E-06 | TRUE | reported | uHjlmt | 394314 |
| Scarring alopecia | rs73052536 | 12 | 7694618 | A | G | 0.0528 | -1.28673 | 0.292094 | 1.06E-05 | TRUE | reported | uHjlmt | 394314 |
| Scarring alopecia | rs9670947 | 13 | 30695262 | G | A | 0.094357 | 0.602087 | 0.134457 | 7.54E-06 | TRUE | reported | uHjlmt | 394314 |
| Scarring alopecia | rs17395691 | 13 | 91028827 | C | T | 0.084348 | 0.596754 | 0.141439 | 2.45E-05 | TRUE | reported | uHjlmt | 394314 |
| Scarring alopecia | rs59506823 | 14 | 92398920 | A | G | 0.046309 | -1.42928 | 0.327581 | 1.28E-05 | TRUE | reported | uHjlmt | 394314 |
| Scarring alopecia | rs1669865 | 15 | 52446202 | C | A | 0.023694 | 0.953359 | 0.223897 | 2.06E-05 | TRUE | reported | uHjlmt | 394314 |
| Scarring alopecia | rs35791929 | 16 | 5913245 | C | A | 0.213483 | -0.56241 | 0.125003 | 6.82E-06 | TRUE | reported | uHjlmt | 394314 |
| Scarring alopecia | rs143097311 | 16 | 11607539 | G | A | 0.012 | 1.20826 | 0.294587 | 4.10E-05 | TRUE | reported | uHjlmt | 394314 |
| Scarring alopecia | rs77886083 | 16 | 84528491 | T | C | 0.022764 | 1.00224 | 0.227719 | 1.08E-05 | TRUE | reported | uHjlmt | 394314 |
| Scarring alopecia | rs7216000 | 17 | 6106636 | T | C | 0.400771 | -0.44435 | 0.09745 | 5.12E-06 | TRUE | reported | uHjlmt | 394314 |
| Scarring alopecia | rs138111998 | 17 | 30847629 | G | C | 0.010351 | 1.2361 | 0.30309 | 4.54E-05 | TRUE | reported | uHjlmt | 394314 |
| Scarring alopecia | rs2834009 | 21 | 32925467 | C | T | 0.343916 | -0.41236 | 0.101354 | 4.73E-05 | TRUE | reported | uHjlmt | 394314 |
| Non-scarring alopecia | rs138471554 | 2 | 44127911 | A | G | 0.001221 | 2.5738 | 0.525613 | 9.74E-07 | TRUE | reported | FmWLCW | 394332 |
| Non-scarring alopecia | rs185840194 | 2 | 1.37E+08 | G | A | 0.029343 | 0.914832 | 0.199259 | 4.41E-06 | TRUE | reported | FmWLCW | 394332 |
| Non-scarring alopecia | rs191850429 | 6 | 94882366 | A | G | 0.001835 | 2.43984 | 0.497293 | 9.28E-07 | TRUE | reported | FmWLCW | 394332 |
| Non-scarring alopecia | rs548502106 | 11 | 21271482 | C | T | 0.00531 | 1.706 | 0.363433 | 2.68E-06 | TRUE | reported | FmWLCW | 394332 |
| Non-scarring alopecia | rs72736047 | 15 | 57323769 | C | G | 0.13365 | 0.532108 | 0.114763 | 3.54E-06 | TRUE | reported | FmWLCW | 394332 |

The table lists all single nucleotide polymorphisms (SNPs) selected as genetic instruments for the four alopecia-related exposures/outcomes. Abbreviations: SNP, Single nucleotide polymorphism; Chr, Chromosome; Pos, Position (GRCh37); Effect all, Effect allele; Other all, Other allele; Eaf, Effect allele frequency; SE, Standard error of the effect size.

**Supplementary Table S4.** Heterogeneity and horizontal pleiotropy analyses for the forward MR analysis.

| **Outcome** | **Exposure** | **Heterogeneity (IVW)** | | **Pleiotropy** | |
| --- | --- | --- | --- | --- | --- |
| **Q** | **Q_pval** | **MR-Egger Intercept** | ***P* value** |
| Alopecia areata | Morningness | 121.22 | 0.43 | -0.005 | 0.77 |
|  | Daytime nap | 88.8 | 0.74 | 0.021 | 0.34 |
|  | Insomnia | 7.07 | 0.79 | 0.182 | 0.24 |
|  | Sleep duration | 110.73 | 0.08 | -0.021 | 0.52 |
| Androgenic alopecia | Morningness | 115.62 | 0.57 | 0.019 | 0.56 |
|  | Daytime nap | 86.34 | 0.79 | -0.052 | 0.2 |
|  | Insomnia | 11.16 | 0.52 | -0.007 | 0.93 |
|  | Sleep duration | 87.57 | 0.49 | -0.145 | 0.05 |
| Scarring alopecia | Morningness | 121.34 | 0.42 | -0.046 | 0.18 |
|  | Daytime nap | 85.8 | 0.81 | -0.037 | 0.37 |
|  | Insomnia | 17.12 | 0.15 | -0.095 | 0.38 |
|  | Sleep duration | 74.91 | 0.89 | -0.015 | 0.79 |
| Nonscarring alopecia | Morningness | 115.55 | 0.57 | 0.04 | 0.22 |
|  | Daytime nap | 85.03 | 0.82 | 0.023 | 0.56 |
|  | Insomnia | 5.67 | 0.93 | -0.056 | 0.52 |
|  | Sleep duration | 76.47 | 0.86 | 0.005 | 0.92 |
| IVW, inverse variance weighted. | | | | | |

The table presents the results from sensitivity analyses assessing heterogeneity and directional pleiotropy for the causal effects of sleep characteristics on alopecia subtypes. Abbreviations: IVW, Inverse variance weighted; Q, Cochran's Q statistic; Q_pval, P-value for Cochran's Q test of heterogeneity; MR-Egger Intercept, The intercept term from the MR-Egger regression, where a deviation from zero may indicate directional pleiotropy; P_value, The P-value for the MR-Egger intercept.

**Supplementary Table S5.** Pleiotropy analysis using the MR-PRESSO global test for the forward MR analysis.

| **Outcome** | **Exposure** | **Raw** | | **Outlier corrected** | | **Global P** | **Number of outliers** | **Distortion P** |
| --- | --- | --- | --- | --- | --- | --- | --- | --- |
| **OR (CI%)** | ***P*** | **OR (CI%)** | ***P*** |
| Alopecia areata | Morningness | 0.81 (0.59-1.1) | 0.18 | NA | NA | 0.437 | NA | NA |
|  | Daytime nap | 1.6 (0.49-5.23) | 0.44 | NA | NA | 0.737 | NA | NA |
|  | Insomnia | 3.88 (1.81-8.31) | 0.01 | NA | NA | 0.816 | NA | NA |
|  | Sleep duration | 0.4 (0.15-1.03) | 0.06 | NA | NA | 0.088 | NA | NA |
| Androgenic alopecia | Morningness | 0.68 (0.39-1.19) | 0.18 | NA | NA | 0.57 | NA | NA |
|  | Daytime nap | 0.63 (0.07-5.63) | 0.68 | NA | NA | 0.784 | NA | NA |
|  | Insomnia | 1.76 (0.39-7.81) | 0.47 | NA | NA | 0.594 | NA | NA |
|  | Sleep duration | 1.29 (0.22-7.51) | 0.78 | NA | NA | 0.273 | NA | NA |
| Scarring alopecia | Morningness | 0.89 (0.49-1.6) | 0.69 | NA | NA | 0.446 | NA | NA |
|  | Daytime nap | 0.58 (0.06-5.43) | 0.64 | NA | NA | 0.814 | NA | NA |
|  | Insomnia | 0.47 (0.07-3.1) | 0.45 | NA | NA | 0.178 | NA | NA |
|  | Sleep duration | 1.38 (0.31-6.22) | 0.68 | NA | NA | 0.886 | NA | NA |
| Nonscarring alopecia | Morningness | 0.85 (0.49-1.47) | 0.56 | NA | NA | 0.546 | NA | NA |
|  | Daytime nap | 0.27 (0.03-2.28) | 0.23 | NA | NA | 0.818 | NA | NA |
|  | Insomnia | 1.29 (0.45-3.69) | 0.64 | NA | NA | 0.945 | NA | NA |
|  | Sleep duration | 0.94 (0.22-4.04) | 0.93 | NA | NA | 0.852 | NA | NA |
| MR, mendelian randomization; MR-PRESSO, MR pleiotropy residual sum and outlier; CI, confidence interval; OR, odds ratio. | | | | | | | | |

The table shows the results of the MR-PRESSO global test for detecting outlier SNPs as an indicator of horizontal pleiotropy in the forward MR analyses. Abbreviations: MR, Mendelian randomization; MR-PRESSO, Mendelian Randomization Pleiotropy RESidual Sum and Outlier; OR (CI%), Odds Ratio (95% Confidence Interval); P, P-value; Global P, The P-value from the MR-PRESSO global test for horizontal pleiotropy; NA, Not applicable as no significant outliers were detected.

**Supplementary Table S6.** Heterogeneity and horizontal pleiotropy analyses for the reverse MR analysis.

| **Outcome** | **Exposure** | **Heterogeneity (IVW)** | | **Pleiotropy** | |
| --- | --- | --- | --- | --- | --- |
| **Q** | **Q_pval** | **MR-Egger Intercept** | ***P* value** |
| Morningness | Alopecia areata | 7.8 | 0.73 | -0.002 | 0.67 |
|  | Androgenic alopecia | 3.12 | 0.37 | -0.008 | 0.45 |
|  | Scarring alopecia | 31.66 | 0.08 | 0.005 | 0.25 |
|  | Nonscarring alopecia | 3.01 | 0.22 | 0.016 | 0.5 |
| Daytime nap | Alopecia areata | 10.84 | 0.37 | 0.001 | 0.58 |
|  | Androgenic alopecia | 6.54 | 0.09 | -0.005 | 0.15 |
|  | Scarring alopecia | 39.29 | 0.01 | 0.001 | 0.4 |
|  | Nonscarring alopecia | 2.36 | 0.31 | -0.004 | 0.51 |
| Insomnia | Alopecia areata | 8.6 | 0.28 | 0.008 | 0.24 |
|  | Androgenic alopecia | 2.44 | 0.3 | -0.015 | 0.38 |
|  | Scarring alopecia | 18.25 | 0.51 | -0.003 | 0.56 |
|  | Nonscarring alopecia | 1.69 | 0.43 | 0.017 | 0.46 |
| Sleep duration | Alopecia areata | 9.82 | 0.55 | 0 | 0.88 |
|  | Androgenic alopecia | 2.14 | 0.54 | 0.005 | 0.38 |
|  | Scarring alopecia | 35.58 | 0.03 | 0 | 0.87 |
|  | Nonscarring alopecia | 3.68 | 0.16 | 0.004 | 0.82 |
| IVW, inverse variance weighted. | | | | | |

The table presents the results from sensitivity analyses assessing heterogeneity and directional pleiotropy for the causal effects of alopecia subtypes on sleep characteristics. Abbreviations: IVW, Inverse variance weighted; Q, Cochran's Q statistic; Q_pval, P-value for Cochran's Q test of heterogeneity; MR-Egger Intercept, The intercept term from the MR-Egger regression; P_value, The P-value for the MR-Egger intercept.

**Supplementary Table S7.** Pleiotropy analysis using the MR-PRESSO global test in the reverse MR analysis.

| **Outcome** | **Exposure** | **Raw** | | **Outlier corrected** | | **Global P** | **Number of outliers** | **Distortion P** |
| --- | --- | --- | --- | --- | --- | --- | --- | --- |
| **OR (CI%)** | ***P*** | **OR (CI%)** | ***P*** |
| Morningness | Alopecia areata | 1.0102 (1.002-1.0186) | 0.03 | NA | NA | 0.738 | NA | NA |
|  | Androgenic alopecia | 0.997 (0.9836-1.0105) | 0.69 | NA | NA | 0.438 | NA | NA |
|  | Scarring alopecia | 1.0008 (0.9947-1.0069) | 0.8 | NA | NA | 0.075 | NA | NA |
| Daytime nap | Alopecia areata | 0.9993 (0.9964-1.0021) | 0.63 | NA | NA | 0.429 | NA | NA |
|  | Androgenic alopecia | 0.9997 (0.9944-1.0049) | 0.91 | NA | NA | 0.193 | NA | NA |
|  | Scarring alopecia | 0.9999 (0.998-1.0019) | 0.94 | 1.0005 | 0.61 | 0.012 | rs13184745 | 0.209 |
| (0.9987-1.0022) |
| Insomnia | Alopecia areata | 1.0034 (0.9895-1.0175) | 0.65 | NA | NA | 0.29 | NA | NA |
|  | Scarring alopecia | 1.0037 (0.9978-1.0097) | 0.23 | NA | NA | 0.525 | NA | NA |
| Sleep duration | Alopecia areata | 0.9998 (0.9952-1.0044) | 0.93 | NA | NA | 0.506 | NA | NA |
|  | Androgenic alopecia | 0.9967 (0.9912-1.0023) | 0.33 | NA | NA | 0.595 | NA | NA |
|  | Scarring alopecia | 0.9988 (0.9956-1.0021) | 0.48 | 0.9998 | 0.87 | 0.039 | rs13184745 | 0.125 |
| (0.9969-1.0026) |
| The MR-PRESSO analysis between some pairs cannot be conducted due to the limited number of SNPs. | | | | | | | | |
| MR, mendelian randomization; MR-PRESSO, MR pleiotropy residual sum and outlier; CI, confidence interval; OR, odds ratio. | | | | | | | | |

The table shows the results of the MR-PRESSO global test for detecting outlier SNPs in the reverse MR analyses. The analysis for some pairs could not be conducted due to the limited number of instrumental variables. Abbreviations: MR, Mendelian randomization; MR-PRESSO, Mendelian Randomization Pleiotropy RESidual Sum and Outlier; OR (CI%), Odds Ratio (95% Confidence Interval); P, P-value; Global P, The P-value from the MR-PRESSO global test for horizontal pleiotropy; NA, Not applicable.

**Supplementary Table S8.** Statistical power calculations for the bidirectional MR analyses.

| Outcome | exposure | Methods | P | OR | case | Sample size | R2xz | K | alpha | power |
| --- | --- | --- | --- | --- | --- | --- | --- | --- | --- | --- |
| Alopecia areata | Chronotype | IVW | 0.17 | 0.81 | 767 | 394872 | 0.014041 | 0.0019424 | 0.05 | 0.0955396 |
| Alopecia areata | Chronotype | MR-Egger | 0.87 | 0.92 | 767 | 394872 | 0.014041 | 0.0019424 | 0.05 | 0.0579196 |
| Alopecia areata | Chronotype | Weighted median | 0.23 | 0.75 | 767 | 394872 | 0.014041 | 0.0019424 | 0.05 | 0.129883 |
| Alopecia areata | Chronotype | Weighted mode | 0.63 | 0.77 | 767 | 394872 | 0.014041 | 0.0019424 | 0.05 | 0.1173182 |
| Alopecia areata | Daytime nap | IVW | 0.46 | 1.6 | 767 | 394872 | 0.0109255 | 0.0019424 | 0.05 | 0.4106368 |
| Alopecia areata | Daytime nap | MR-Egger | 0.47 | 0.19 | 767 | 394872 | 0.0109255 | 0.0019424 | 0.05 | 0.6509006 |
| Alopecia areata | Daytime nap | Weighted median | 0.68 | 0.68 | 767 | 394872 | 0.0109255 | 0.0019424 | 0.05 | 0.1525507 |
| Alopecia areata | Daytime nap | Weighted mode | 0.72 | 0.52 | 767 | 394872 | 0.0109255 | 0.0019424 | 0.05 | 0.2846733 |
| Alopecia areata | Insomnia | IVW | 0.01 | 3.88 | 767 | 394872 | 0.0013989 | 0.0019424 | 0.05 | 0.8479373 |
| Alopecia areata | Insomnia | MR-Egger | 0.37 | 0.02 | 767 | 394872 | 0.0013989 | 0.0019424 | 0.05 | 0.1743107 |
| Alopecia areata | Insomnia | Weighted median | 0.03 | 3.94 | 767 | 394872 | 0.0013989 | 0.0019424 | 0.05 | 0.8622637 |
| Alopecia areata | Insomnia | Weighted mode | 0.13 | 5.38 | 767 | 394872 | 0.0013989 | 0.0019424 | 0.05 | 0.9955889 |
| Alopecia areata | Sleep duration | IVW | 0.06 | 0.4 | 767 | 394872 | 0.0109403 | 0.0019424 | 0.05 | 0.4126694 |
| Alopecia areata | Sleep duration | MR-Egger | 0.89 | 1.31 | 767 | 394872 | 0.0109403 | 0.0019424 | 0.05 | 0.1459645 |
| Alopecia areata | Sleep duration | Weighted median | 0.45 | 0.59 | 767 | 394872 | 0.0109403 | 0.0019424 | 0.05 | 0.2207895 |
| Alopecia areata | Sleep duration | Weighted mode | 0.4 | 0.46 | 767 | 394872 | 0.0109403 | 0.0019424 | 0.05 | 0.3465785 |
| Androgenetic alopecia | Chronotype | IVW | 0.18 | 0.68 | 220 | 219469 | 0.014041 | 0.0010024 | 0.05 | 0.0869433 |
| Androgenetic alopecia | Chronotype | MR-Egger | 0.33 | 0.41 | 220 | 219469 | 0.014041 | 0.0010024 | 0.05 | 0.1794364 |
| Androgenetic alopecia | Chronotype | Weighted median | 0.12 | 0.51 | 220 | 219469 | 0.014041 | 0.0010024 | 0.05 | 0.1383488 |
| Androgenetic alopecia | Chronotype | Weighted mode | 0.41 | 0.45 | 220 | 219469 | 0.014041 | 0.0010024 | 0.05 | 0.16204 |
| Androgenetic alopecia | Daytime nap | IVW | 0.7 | 0.63 | 220 | 219469 | 0.0109255 | 0.0010024 | 0.05 | 0.0884628 |
| Androgenetic alopecia | Daytime nap | MR-Egger | 0.25 | 140.52 | 220 | 219469 | 0.0109255 | 0.0010024 | 0.05 | NA |
| Androgenetic alopecia | Daytime nap | Weighted median | 0.77 | 1.68 | 220 | 219469 | 0.0109255 | 0.0010024 | 0.05 | 0.1835687 |
| Androgenetic alopecia | Daytime nap | Weighted mode | 0.7 | 5.62 | 220 | 219469 | 0.0109255 | 0.0010024 | 0.05 | 0.9999999 |
| Androgenetic alopecia | Insomnia | IVW | 0.48 | 1.76 | 220 | 219469 | 0.0013989 | 0.0010024 | 0.05 | 0.0705608 |
| Androgenetic alopecia | Insomnia | MR-Egger | 0.74 | 2.09 | 220 | 219469 | 0.0013989 | 0.0010024 | 0.05 | 0.0927419 |
| Androgenetic alopecia | Insomnia | Weighted median | 0.52 | 2.04 | 220 | 219469 | 0.0013989 | 0.0010024 | 0.05 | 0.0888429 |
| Androgenetic alopecia | Insomnia | Weighted mode | 0.58 | 2.21 | 220 | 219469 | 0.0013989 | 0.0010024 | 0.05 | 0.1028984 |
| Androgenetic alopecia | Sleep duration | IVW | 0.75 | 1.32 | 220 | 219469 | 0.0109403 | 0.0010024 | 0.05 | 0.0786353 |
| Androgenetic alopecia | Sleep duration | MR-Egger | 0.05 | 8793.87 | 220 | 219469 | 0.0109403 | 0.0010024 | 0.05 | NA |
| Androgenetic alopecia | Sleep duration | Weighted median | 0.56 | 2.09 | 220 | 219469 | 0.0109403 | 0.0010024 | 0.05 | 0.3934742 |
| Androgenetic alopecia | Sleep duration | Weighted mode | 0.33 | 9.34 | 220 | 219469 | 0.0109403 | 0.0010024 | 0.05 | 1 |
| Scarring alopecia | Chronotype | IVW | 0.69 | 0.89 | 209 | 394314 | 0.014041 | 0.00053 | 0.05 | 0.0540758 |
| Scarring alopecia | Chronotype | MR-Egger | 0.25 | 2.94 | 209 | 394314 | 0.014041 | 0.00053 | 0.05 | 0.9134608 |
| Scarring alopecia | Chronotype | Weighted median | 0.95 | 1.03 | 209 | 394314 | 0.014041 | 0.00053 | 0.05 | 0.0503024 |
| Scarring alopecia | Chronotype | Weighted mode | 0.22 | 3.51 | 209 | 394314 | 0.014041 | 0.00053 | 0.05 | 0.9903612 |
| Scarring alopecia | Daytime nap | IVW | 0.66 | 0.58 | 209 | 394314 | 0.0109255 | 0.00053 | 0.05 | 0.0972706 |
| Scarring alopecia | Daytime nap | MR-Egger | 0.46 | 26.26 | 209 | 394314 | 0.0109255 | 0.00053 | 0.05 | 1 |
| Scarring alopecia | Daytime nap | Weighted median | 0.56 | 2.81 | 209 | 394314 | 0.0109255 | 0.00053 | 0.05 | 0.7805804 |
| Scarring alopecia | Daytime nap | Weighted mode | 0.5 | 10.05 | 209 | 394314 | 0.0109255 | 0.00053 | 0.05 | 1 |
| Scarring alopecia | Insomnia | IVW | 0.43 | 0.47 | 209 | 394314 | 0.0013989 | 0.00053 | 0.05 | 0.0594621 |
| Scarring alopecia | Insomnia | MR-Egger | 0.59 | 4.49 | 209 | 394314 | 0.0013989 | 0.00053 | 0.05 | 0.4718491 |
| Scarring alopecia | Insomnia | Weighted median | 0.9 | 0.87 | 209 | 394314 | 0.0013989 | 0.00053 | 0.05 | 0.050566 |
| Scarring alopecia | Insomnia | Weighted mode | 0.54 | 2.67 | 209 | 394314 | 0.0013989 | 0.00053 | 0.05 | 0.1472787 |
| Scarring alopecia | Sleep duration | IVW | 0.7 | 1.38 | 209 | 394314 | 0.0109403 | 0.00053 | 0.05 | 0.0885674 |
| Scarring alopecia | Sleep duration | MR-Egger | 0.73 | 3.21 | 209 | 394314 | 0.0109403 | 0.00053 | 0.05 | 0.9164154 |
| Scarring alopecia | Sleep duration | Weighted median | 0.72 | 1.6 | 209 | 394314 | 0.0109403 | 0.00053 | 0.05 | 0.1482139 |
| Scarring alopecia | Sleep duration | Weighted mode | 0.8 | 1.57 | 209 | 394314 | 0.0109403 | 0.00053 | 0.05 | 0.1383907 |
| Nonscarring alopecia | Chronotype | IVW | 0.57 | 0.85 | 227 | 394332 | 0.014041 | 0.0005757 | 0.05 | 0.0582519 |
| Nonscarring alopecia | Chronotype | MR-Egger | 0.18 | 0.3 | 227 | 394332 | 0.014041 | 0.0005757 | 0.05 | 0.2395365 |
| Nonscarring alopecia | Chronotype | Weighted median | 0.18 | 0.57 | 227 | 394332 | 0.014041 | 0.0005757 | 0.05 | 0.1197661 |
| Nonscarring alopecia | Chronotype | Weighted mode | 0.3 | 0.37 | 227 | 394332 | 0.014041 | 0.0005757 | 0.05 | 0.2028736 |
| Nonscarring alopecia | Daytime nap | IVW | 0.26 | 0.27 | 227 | 394332 | 0.0109255 | 0.0005757 | 0.05 | 0.2099025 |
| Nonscarring alopecia | Daytime nap | MR-Egger | 0.38 | 0.02 | 227 | 394332 | 0.0109255 | 0.0005757 | 0.05 | 0.3390148 |
| Nonscarring alopecia | Daytime nap | Weighted median | 0.79 | 0.64 | 227 | 394332 | 0.0109255 | 0.0005757 | 0.05 | 0.0875563 |
| Nonscarring alopecia | Daytime nap | Weighted mode | 0.86 | 1.78 | 227 | 394332 | 0.0109255 | 0.0005757 | 0.05 | 0.2327134 |
| Nonscarring alopecia | Insomnia | IVW | 0.74 | 1.29 | 227 | 394332 | 0.0013989 | 0.0005757 | 0.05 | 0.0530622 |
| Nonscarring alopecia | Insomnia | MR-Egger | 0.48 | 4.88 | 227 | 394332 | 0.0013989 | 0.0005757 | 0.05 | 0.5911454 |
| Nonscarring alopecia | Insomnia | Weighted median | 0.51 | 2.02 | 227 | 394332 | 0.0013989 | 0.0005757 | 0.05 | 0.0885805 |
| Nonscarring alopecia | Insomnia | Weighted mode | 0.42 | 3.19 | 227 | 394332 | 0.0013989 | 0.0005757 | 0.05 | 0.2346002 |
| Nonscarring alopecia | Sleep duration | IVW | 0.94 | 0.94 | 227 | 394332 | 0.0109403 | 0.0005757 | 0.05 | 0.0510243 |
| Nonscarring alopecia | Sleep duration | MR-Egger | 0.91 | 0.68 | 227 | 394332 | 0.0109403 | 0.0005757 | 0.05 | 0.0796015 |
| Nonscarring alopecia | Sleep duration | Weighted median | 0.79 | 0.72 | 227 | 394332 | 0.0109403 | 0.0005757 | 0.05 | 0.072583 |
| Nonscarring alopecia | Sleep duration | Weighted mode | 0.53 | 0.35 | 227 | 394332 | 0.0109403 | 0.0005757 | 0.05 | 0.1762067 |
| Morningness | Alopecia areata | IVW | 0.04 | 1.0102 | 252287 | 403195 | 0.0010456 | 0.6257196 | 0.05 | 0.0511627 |
| Morningness | Alopecia areata | MR-Egger | 0.17 | 1.0137 | 252287 | 403195 | 0.0010456 | 0.6257196 | 0.05 | 0.0520896 |
| Morningness | Alopecia areata | Weighted median | 0.07 | 1.0119 | 252287 | 403195 | 0.0010456 | 0.6257196 | 0.05 | 0.0515796 |
| Morningness | Alopecia areata | Weighted mode | 0.2 | 1.0117 | 252287 | 403195 | 0.0010456 | 0.6257196 | 0.05 | 0.0515273 |
| Morningness | Androgenetic alopecia | IVW | 0.66 | 0.997 | 252287 | 403195 | 0.0005183 | 0.6257196 | 0.05 | 0.0500506 |
| Morningness | Androgenetic alopecia | MR-Egger | 0.63 | 1.0074 | 252287 | 403195 | 0.0005183 | 0.6257196 | 0.05 | 0.0503042 |
| Morningness | Androgenetic alopecia | Weighted median | 0.49 | 0.9942 | 252287 | 403195 | 0.0005183 | 0.6257196 | 0.05 | 0.05019 |
| Morningness | Androgenetic alopecia | Weighted mode | 0.42 | 0.9899 | 252287 | 403195 | 0.0005183 | 0.6257196 | 0.05 | 0.0505794 |
| Morningness | Scarring hair loss | IVW | 0.79 | 1.0008 | 252287 | 403195 | 0.0011184 | 0.6257196 | 0.05 | 0.0500077 |
| Morningness | Scarring hair loss | MR-Egger | 0.35 | 0.9931 | 252287 | 403195 | 0.0011184 | 0.6257196 | 0.05 | 0.0505812 |
| Morningness | Scarring hair loss | Weighted median | 0.7 | 0.9984 | 252287 | 403195 | 0.0011184 | 0.6257196 | 0.05 | 0.050031 |
| Morningness | Scarring hair loss | Weighted mode | 0.35 | 0.9954 | 252287 | 403195 | 0.0011184 | 0.6257196 | 0.05 | 0.0502575 |
| Morningness | Other nonscarring hair loss | IVW | 0.52 | 1.0069 | 252287 | 403195 | 0.0002857 | 0.6257196 | 0.05 | 0.0501459 |
| Morningness | Other nonscarring hair loss | MR-Egger | 0.66 | 0.9857 | 252287 | 403195 | 0.0002857 | 0.6257196 | 0.05 | 0.0506436 |
| Morningness | Other nonscarring hair loss | Weighted median | 0.57 | 1.0062 | 252287 | 403195 | 0.0002857 | 0.6257196 | 0.05 | 0.0501179 |
| Morningness | Other nonscarring hair loss | Weighted mode | 0.59 | 1.0079 | 252287 | 403195 | 0.0002857 | 0.6257196 | 0.05 | 0.050191 |
| Insomnia | Alopecia areata | IVW | 0.63 | 1.0034 | 109389 | 386533 | 0.0010456 | 0.2830004 | 0.05 | 0.0501084 |
| Insomnia | Alopecia areata | MR-Egger | 0.41 | 0.9881 | 109389 | 386533 | 0.0010456 | 0.2830004 | 0.05 | 0.0513404 |
| Insomnia | Alopecia areata | Weighted median | 0.73 | 1.003 | 109389 | 386533 | 0.0010456 | 0.2830004 | 0.05 | 0.0500844 |
| Insomnia | Alopecia areata | Weighted mode | 0.99 | 1.0002 | 109389 | 386533 | 0.0010456 | 0.2830004 | 0.05 | 0.0500004 |
| Insomnia | Androgenetic alopecia | IVW | 0.44 | 0.9927 | 109389 | 386533 | 0.0005183 | 0.2830004 | 0.05 | 0.0502492 |
| Insomnia | Androgenetic alopecia | MR-Egger | 0.54 | 1.0164 | 109389 | 386533 | 0.0005183 | 0.2830004 | 0.05 | 0.0512418 |
| Insomnia | Androgenetic alopecia | Weighted median | 0.48 | 0.9929 | 109389 | 386533 | 0.0005183 | 0.2830004 | 0.05 | 0.0502357 |
| Insomnia | Androgenetic alopecia | Weighted mode | 0.39 | 0.988 | 109389 | 386533 | 0.0005183 | 0.2830004 | 0.05 | 0.0506754 |
| Insomnia | Scarring hair loss | IVW | 0.22 | 1.0037 | 109389 | 386533 | 0.0011184 | 0.2830004 | 0.05 | 0.0501373 |
| Insomnia | Scarring hair loss | MR-Egger | 0.31 | 1.0076 | 109389 | 386533 | 0.0011184 | 0.2830004 | 0.05 | 0.0505781 |
| Insomnia | Scarring hair loss | Weighted median | 0.07 | 1.008 | 109389 | 386533 | 0.0011184 | 0.2830004 | 0.05 | 0.0506405 |
| Insomnia | Scarring hair loss | Weighted mode | 0.13 | 1.0084 | 109389 | 386533 | 0.0011184 | 0.2830004 | 0.05 | 0.050706 |
| Insomnia | Other nonscarring hair loss | IVW | 0.83 | 0.9978 | 109389 | 386533 | 0.0002857 | 0.2830004 | 0.05 | 0.0500124 |
| Insomnia | Other nonscarring hair loss | MR-Egger | 0.47 | 0.9747 | 109389 | 386533 | 0.0002857 | 0.2830004 | 0.05 | 0.0516686 |
| Insomnia | Other nonscarring hair loss | Weighted median | 0.88 | 0.9983 | 109389 | 386533 | 0.0002857 | 0.2830004 | 0.05 | 0.0500074 |
| Insomnia | Other nonscarring hair loss | Weighted mode | 0.76 | 1.0041 | 109389 | 386533 | 0.0002857 | 0.2830004 | 0.05 | 0.050043 |
| note: OR, odds ratio; IVW, inverse variance weighted; alpha, Type-I error rate; K, Proportion of cases in the study; R2zx, Proportion of variance explained for the association between the SNP or allele score (Z)  and the exposure variable (X); POWER was calculated in https://shiny.cnsgenomics.com/mRnd/; When "sleep duration" and "Daytime nap" serving as outcomes, statistic power cannot be calculated for these two are not binary outcomes | | | | | | | | | | |

The table provides the estimated statistical power for each Mendelian randomization analysis, calculated using an online tool (https://shiny.cnsgenomics.com/mRnd/). Abbreviations: OR, Odds ratio; R2xz, Proportion of variance in the exposure explained by the instrumental variables; K, Proportion of cases in the study; alpha, Type-I error rate (set at 0.05); power, Statistical power to detect a causal effect of the observed magnitude.
